# 1 **Semiochemical responsive olfactory sensory neurons are sexually dimorphic and plastic**

2

3 Aashutosh Vihani<sup>1\*</sup>, Xiaoyang Serene Hu<sup>2</sup>, Sivaji Gundala<sup>3</sup>, Sachiko Koyama<sup>4</sup>, Eric Block<sup>3</sup>, Hiroaki

4 Matsunami<sup>1,2,5\*</sup>

5 1. Department of Neurobiology, Neurobiology graduate program, Duke University Medical Center,

6 Durham, NC 27710, USA

7 2. Department of Molecular Genetics and Microbiology, Duke University Medical Center, Durham,

8 NC, 27710, USA

9 3. Department of Chemistry, University at Albany, State University of New York, Albany, NY 12222,

10 USA

11 4. School of Medicine, Medical Sciences, Indiana University, Bloomington, IN 47405 USA

12 5. Duke Institute for Brain Sciences, Duke University, Durham, NC 27710, USA

13 \*Co-correspondence: [aashutosh.vihani@duke.edu](mailto:aashutosh.vihani@duke.edu) (AV), [hiroaki.matsunami@duke.edu](mailto:hiroaki.matsunami@duke.edu) (HM)

14

## 15 **Contributions**

16 Conceptualization: AV and HM. Methodology: AV and HM. Investigation: AV, XSH, and HM. Formal

17 analysis: AV. Resources: SG, SK, EB, and HM. Writing – original draft preparation: AV. Writing – review

18 & editing: AV and HM. Funding acquisition: EB and HM.

19

20 **Acknowledgements:** We thank Claire A. de March, Ha Na Choe, Conan Juan, and Yen Dinh for

21 comments on the manuscript.

22 **Funding Sources:** This work was funded by NIH (DC014423 and DC016224) and NSF (1556207).

23 **Competing Interests:** None.

24 **Abstract**

25 Understanding how genes and experiences work in concert to generate phenotypic variability will  
26 provide a better understanding of individuality. Here, we considered this in the context of the main  
27 olfactory epithelium, a chemosensory structure with over a thousand distinct cell-types, in mice. We  
28 identified a subpopulation of at least three types of olfactory sensory neurons, defined by receptor  
29 expression, whose abundances were sexually dimorphic. This subpopulation of olfactory sensory  
30 neurons was over-represented in sex-separated female mice and responded robustly to the male-  
31 specific semiochemicals 2-*sec*-butyl-4,5-dihydrothiazole and (methylthio)methanethiol. Sex-combined  
32 housing led to a robust attenuation of the female over-representation. Testing of *Bax* null mice  
33 revealed a *Bax*-dependence in generating the sexual dimorphism in sex-separated mice. Altogether,  
34 our results suggest a profound role of experience in influencing homeostatic neural lifespan  
35 mechanisms to generate a robust sexually dimorphic phenotype in the main olfactory epithelium.

## 36 **Introduction**

37 Emergence of individuality is a ubiquitous feature across animals. It refers to the differing biological  
38 factors (“nature”), experiences (“nurture”), and randomness that generate phenotypic variability.  
39 Evidence for this variability has led to extensive research on the adaptive significance and ecological, or  
40 evolutionary, consequences of individuality<sup>1</sup>. Nonetheless, insight into the relative contributions and  
41 proximal mechanisms of “nature” versus “nurture” in generating phenotypic variabilities have been  
42 largely elusive.

43  
44 One robust example of nature-induced inter-individual variability is sexual dimorphism. Previous work  
45 has identified both anatomical and functional substrates of this nature-induced variability in the  
46 nervous system of mice<sup>2-5</sup>. Similarly, extensive literature points towards an essential role of nurture-  
47 induced variability by experience-dependent, or activity-dependent, neural plasticity<sup>6-8</sup>. Here, to  
48 investigate how nature and nurture work in concert to generate biological variability, we focused on  
49 the mouse main olfactory epithelium (MOE), a chemosensory structure devoted to the detection of  
50 volatile odor cues. Olfactory sensory neurons (OSNs) found in the MOE express a single olfactory  
51 receptor (OR) in a monoallelic fashion out of a large and diverse family of over 1,000 candidate  
52 genes<sup>9,10</sup>, thus enabling this system with an incredible potential for the emergence of individuality at  
53 the level of cell types. Odor recognition at the level of OSNs additionally has been shown to follow a  
54 combinatorial coding scheme where one OR can be activated by a set of odorants and one odorant can  
55 activate a combination of ORs<sup>11,12</sup>. Through such combinatorial coding, it has been postulated that  
56 organisms, including mice and humans, can detect and discriminate against a myriad of odor  
57 molecules.

58  
59 We performed RNA-Seq on the whole olfactory mucosa of mice of different sexes (“nature”) and  
60 experiences (“nurture”) to investigate origins of inter-individual differences. In doing so, we uncovered

61 a subset of ORs that exhibit sexually dimorphic expression under sex-separated conditions. *In situ*  
62 mRNA hybridization probing for the expression of these ORs demonstrated the proportions of OSNs  
63 expressing these ORs to be over-represented in female mice. Activity-dependent labeling experiments  
64 further identified this subpopulation of OSNs as selective responders to odor cues generated by  
65 mature male mice. Targeted screening of previously identified sex-specific and sex-enriched volatiles  
66 demonstrated that this subpopulation of OSNs responded robustly to the reproductive-behavior and  
67 physiology modifying semiochemicals 2-sec-butyl-4,5-dihydrothiazole (SBT) and  
68 (methylthio)methanethiol (MTMT) *in vivo*. Finally, to test the role of experience in generating this  
69 sexual dimorphism, we switched male and female mice from sex-separated conditions to sex-  
70 combined conditions and learned the sexual dimorphism had severely attenuated. Examination of sex-  
71 separated mutant mice null for the BCL2-associated X protein (*Bax*<sup>-/-</sup>) revealed a failure to generate  
72 robust sexual dimorphisms within the whole olfactory mucosa. During the course of our investigations,  
73 a report, van der Linden et al. 2018, was also published with some overlapping findings. Altogether,  
74 these results suggest a link between specific olfactory experiences and OSN lifespan as a means to  
75 influence sensory cell-level odor representations in the olfactory system.

76

## 77 **Results**

### 78 **Identification of sexually dimorphic ORs in the MOE**

79 We first performed RNA-Seq on the whole olfactory mucosa of male and female mice at various ages  
80 housed under sex-separated conditions (Figure 1A). Differential expression analysis of ORs revealed no  
81 obvious sexually dimorphic OR expression at 3 weeks (weaning) age. In contrast, progressive  
82 differential expression analysis of ORs at 9, 26, and 43 weeks age revealed at least three OR genes:  
83 *Olfir910*, *Olfir912*, and *Olfir1295*, to exhibit growing and robust enrichment in female mice (Figure 1B-E).  
84 Examination of the proportion reads aligned to each of these ORs longitudinally revealed amplification  
85 of the dimorphism between the sexes with longer-term sex-separation (Figure 1F). Furthermore, this

86 amplification appeared to exhibit receptor-specific patterns, as *Olfr1295* exhibited near-maximally  
87 dimorphic enrichment in female mice by 9 weeks age. In contrast, *Olfr910*, and *Olfr912*, which did not  
88 exhibit obvious dimorphic expression at 9 weeks age, were robustly dimorphic by 43 weeks age (at 43-  
89 weeks-old: *Olfr910*  $\log_2FC = 2.15$ ,  $FDR < 6.89E-23$ ; *Olfr912*  $\log_2FC = 2.15$ ,  $FDR < 4.90E-15$ ; *Olfr1295*  
90  $\log_2FC = 2.62$ ,  $FDR < 4.29E-18$ ).

91  
92 Past work demonstrating a correlation between OR transcript abundance and the number of OSNs  
93 expressing those ORs, led us to quantify the number of OSNs expressing these ORs by *in situ*  
94 hybridization<sup>13,14</sup>. We probed specifically for the expression of *Olfr910*, *Olfr912*, and *Olfr1295* on the  
95 MOE of sex-separated male and female mice using anti-sense probes against the open reading frames  
96 (ORF) of each of these ORs. Given the 96% nucleotide sequence identity of *Olfr910* and *Olfr912*, anti-  
97 sense ORF probes against either *Olfr910* or *Olfr912* labelled OSN populations expressing either  
98 receptor (hereafter denoted as *Olfr910/912*). The results of the *in situ* hybridization demonstrated that  
99 the proportion of OSNs expressing *Olfr910/912* ( $p < 0.0001$ , unpaired two-tailed t-test), and *Olfr1295*  
100 ( $p < 0.01$ , unpaired two tailed t-test), was greater in 43-week-old female mice than in 43-week-old  
101 male mice (Figure 2A-D). Altogether, these results lead us to conclude that the subpopulation of OSNs  
102 expressing *Olfr910/912* and *Olfr1295* are over-represented in sex-separated female mice compared to  
103 sex-separated male mice.

104

### 105 **Sexually dimorphic OSNs are selectively activated by the scent of adult male mice *in vivo***

106 Our identification of a subpopulation of OSNs to be over-represented in sex-separated female mice led  
107 us to hypothesize an essential role of the associated ORs in detecting sex-specific odors. To test this  
108 hypothesis, we briefly exposed juvenile mice (~3-weeks-old) to either a blank odor cassette (control),  
109 mature male mice, mature female mice, or 10 $\mu$ L of 1% (v/v) acetophenone spotted onto blotting paper  
110 placed inside an odor cassette (Figure 3A). We specifically focused on OSNs expressing *Olfr910/912* or

111 *Olf1295* by *in situ* hybridization and performed immunostaining for the phosphorylation of ribosomal  
112 subunit S6 (pS6), a pan-neuronal marker of activity<sup>11,15</sup>.

113  
114 Double *in situ* hybridization and immunostaining revealed the subpopulation of OSNs expressing  
115 *Olf910/912* ( $p < 0.0001$ , one-way ANOVA with Dunnett's multiple comparisons test correction) and  
116 *Olf1295* ( $p < 0.05$ , one-way ANOVA with Dunnett's multiple comparisons test correction) to display  
117 elevated pS6 staining intensity when exposed to mature male mice (Figure 3B-E). Exposure to mature  
118 female mice or acetophenone did not lead to significant induction of pS6 in the subpopulation of OSNs  
119 expressing either *Olf910/912* or *Olf1295*. Altogether, our results suggest that the subpopulation of  
120 OSNs that express these receptors be selective responders to the natural scent of mature male mice.

121

### 122 **Sexually dimorphic OSNs are selectively responsive to specific semiochemicals *in vivo***

123 The observation that OSNs expressing *Olf910/912* and *Olf1295* are activated by the scent of mature  
124 male mice led us to hypothesize that this subpopulation of OSNs responds specifically to sexually  
125 dimorphic odors produced by mature male mice. To test this hypothesis, we searched the literature for  
126 known sex-specific or sex-enriched odors and leveraged phosphorylated S6 ribosomal subunit capture  
127 (pS6-IP) as a means to determine the molecular identities of the OSNs activated by monomolecular  
128 odorants *in vivo*. Immunoprecipitation of phosphorylated ribosomes from activated neurons followed  
129 by associated mRNA profiling by RNA-Seq (pS6-IP-Seq) and differential expression analysis, enabled us  
130 to perform an unbiased identification of the molecular profiles, including ORs expressed, of OSNs  
131 activated by specific odorants (Figure 4A)<sup>11</sup>.

132

133 While the origins of the differences between the scents of mature male and female mice are diverse,  
134 we reasoned mouse urine to be a significant source of odor cues. Past literature contrasting intact  
135 male mouse urine, castrated male mouse urine, and female mouse urine volatiles has identified many

136 components to differ in their presence and abundance<sup>16-21</sup>. Using pS6-IP-Seq we systematically  
137 screened the mouse urine constituents: 2-sec-butyl-4,5-dihydrothiazole (SBT);  
138 (methylthio)methanethiol (MTMT);  $\beta$ -caryophyllene; 3,4-dehydro-*exo*-brevicomine; 2,5-  
139 dimethylpyrazine; (E)- $\beta$ -farnesene; and 2-heptanone (Figure 4B).  
140  
141 Differential expression analysis following pS6-IP-Seq across the tested panel of odorants (Figure 4C,  
142 Supplementary Figure 1, Supplementary Figure 2) led to the identification of SBT as an activator for  
143 OSNs expressing *Olf910* and *Olf912* and MTMT as an activator for OSNs expressing *Olf1295*. Indeed,  
144 exposure to 10 $\mu$ L of 0.01% (v/v) SBT lead to the lowest false discovery rate (FDR) and greatest  
145 enrichment of transcripts for *Olf910* and *Olf912* from activated OSNs (at an FDR < 0.05), compared to  
146 all other ORs, suggesting OSNs expressing *Olf910* and *Olf912* to be the most robustly responding  
147 OSNs for SBT *in vivo* (Figure 4C) (*Olf910* log<sub>2</sub>FC = 3.11, FDR < 1.25E-35; *Olf912* log<sub>2</sub>FC = 2.89, FDR <  
148 7.97E-22). Similarly, exposure to 10 $\mu$ L of 100 $\mu$ M MTMT lead to the lowest FDR and greatest  
149 enrichment of transcripts for *Olf1295* from activated OSNs (at an FDR < 0.05), compared to all other  
150 ORs, suggesting OSNs expressing *Olf1295* to be the most robustly responding OSNs for MTMT *in vivo*  
151 (Figure 4F) (log<sub>2</sub>FC = 1.86, FDR < 1.34E-5).  
152  
153 To independently validate the pS6-IP-Seq data, we briefly exposed juvenile mice to either an empty  
154 odor cassette (control), varying concentrations of SBT or MTMT, or 1% (v/v) acetophenone, and then  
155 harvested MOE for staining. *In situ* hybridization probing for the expression of *Olf910/912* and  
156 immunostaining for pS6 showed OSNs expressing *Olf910/912* to display increasingly intense pS6  
157 immunostaining following exposure to SBT in a concentration-dependent manner (0.01% SBT p < 0.05;  
158 0.1% SBT p < 0.0001; 1% SBT p < 0.0001, one-way ANOVA with Dunnett's multiple comparisons test  
159 correction). Further, in accordance with our previous findings, exposure to acetophenone did not lead

160 to significant pS6 induction in OSNs expressing *Olfr910/912* (Figure 4D-E)<sup>11,22</sup>. Similarly, OSNs  
161 expressing *Olfr1295*, identified by *in situ* hybridization, displayed increasingly intense pS6  
162 immunostaining following exposure to MTMT in a concentration-dependent manner (100  $\mu$ M MTMT p  
163 < 0.01; 10 mM MTMT p < 0.0001, one-way ANOVA with Dunnett's multiple comparisons test  
164 correction). OSNs expressing *Olfr1295* displayed a non-significant pS6 signal intensity difference  
165 following exposure to acetophenone compared to control conditions (Figure 4G-H).

166  
167 To further validate our identified ligand-receptor pairs we tested mature male and female mice. We  
168 provided a brief exposure to sex-separated, 26-week-old adult male and female mice to either an  
169 empty odor cassette (control), 0.1% (v/v) SBT, varying concentrations of MTMT, or 1% (v/v)  
170 acetophenone, and then harvested MOE for staining. Double *in situ* hybridization and pS6  
171 immunostaining revealed the following: OSNs expressing *Olfr910/912* showed pS6 signals only  
172 following SBT exposure (Figure 5A) (p < 0.0001, one-way ANOVA with Tukey's multiple comparisons  
173 test correction), OSNs expressing *Olfr983* showed pS6 signals only following acetophenone exposure  
174 (Figure 5C) (p < 0.0001, one-way ANOVA with Tukey's multiple comparisons test correction)<sup>11</sup>, and  
175 OSNs expressing *Olfr1295* showed pS6 signals only following MTMT exposure (Figure 5B) (p < 0.0001,  
176 one-way ANOVA with Tukey's multiple comparisons test correction). We did not observe any sex bias  
177 in the responsivity of sensory cell populations at the single-cell level by pS6 signal intensity induction  
178 by exposure to either SBT or acetophenone. Female mouse OSNs expressing *Olfr1295* exhibited a  
179 subtle but significant response to 10mM MTMT compared to male mouse OSNs expressing *Olfr1295*  
180 worthy of potential future investigation (p < 0.05, one-way ANOVA with Tukey's multiple comparisons  
181 test correction). Nonetheless, our combination of pS6-IP-Seq and *in situ* results are consistent with the  
182 idea that SBT activates OSNs expressing *Olfr910/912* more robustly than any other OSN *in vivo*, and  
183 MTMT activates OSNs expressing *Olfr1295* more robustly than any other OSN *in vivo*.

184



185 **Long-term cohabitation with the opposite sex is sufficient to attenuate sexual dimorphism in the**

186 **MOE**

187 Emerging literature has evidenced a role for experience in influencing sensory-cell representations  
188 within the olfactory epithelium<sup>14,23,24</sup>. Thus, our identification of a subset of over-represented ORs in  
189 sex-separated female mice led to us to hypothesize a role for experience in generating this  
190 dimorphism.

191

192 We hypothesized that regular exposure of a female mouse to the semiochemicals SBT and MTMT, by  
193 cohabitation with a male mouse, would influence the population dynamics of OSNs expressing *Olfr910*,  
194 *Olfr912*, and *Olfr1295*. To test this hypothesis, we used mice that were first sex-separated from  
195 weaning (~3 weeks age) until 26 weeks of age. These sex-separated mice were then switched to  
196 cohabitation with the opposite sex (sex-combined housing) from 26 weeks age to 43 weeks age (Figure  
197 6A). At 43 weeks age, whole olfactory mucosa from the male and female mice was harvested and  
198 processed for sequencing and histology.

199

200 Differential expression analysis of whole olfactory mucosa from sex-combined male and female mice  
201 revealed a severe attenuation of the dimorphic expression of *Olfr910*, *Olfr912*, and *Olfr1295* (Figure  
202 6B) (at 43-weeks-old: *Olfr910* log<sub>2</sub>FC = 0.77, FDR > 0.80; *Olfr912* log<sub>2</sub>FC = 0.58, FDR > 0.83; *Olfr1295*  
203 log<sub>2</sub>FC = 0.74, FDR > 0.82). After 17 weeks of sex-combined housing, the proportional expression of  
204 each of these receptors changed much more profoundly in female mice than male mice, again, in a  
205 receptor-specific fashion. Normalized expression of *Olfr910* and *Olfr912* appeared to be more similar  
206 between sex-separated males, sex-combined males, and sex-combined females while being distinct  
207 and less than sex-separated females. On the other hand, the normalized expression of *Olfr1295*  
208 appeared to be greatest in sex-separated females, decreasing in sex-combined females, sex-combined  
209 males, and lowest in sex-separated males (Figure 6C). *In situ* hybridization to assess the proportional

210 abundance of OSNs expressing these receptors revealed, again, that sex-separated female mice were  
211 distinct from sex-combined female, sex-combined male, and sex-separated male mice. Sex-separated  
212 female mice had an over-representation of OSNs expressing *Olfr910/912* ( $p < 0.0001$ , one-way ANOVA  
213 with Tukey's multiple comparisons test correction) and *Olfr1295* ( $p < 0.001$ , one-way ANOVA with  
214 Tukey's multiple comparisons test correction) while mice from other conditions were all comparable.  
215 These findings suggest cohabitation with the opposite sex, and potentially olfactory experience, is  
216 sufficient to attenuate the over-representation of the subpopulation of sexually dimorphic OSNs  
217 (Figure 6D-G, Supplementary Figure 3).

218

### 219 **Generating robust sexual dimorphisms in the MOE is *Bax*-dependent**

220 Our observation that specific experiences influence OSN population dynamics led to us hypothesize a  
221 link between OSN activity and neuronal lifespan<sup>25,26</sup>. Significant past literature has evidenced a role for  
222 neural activity to lengthen the lifespan of a neuron in a Bcl2-associated X protein (*Bax*)-dependent  
223 manner<sup>27</sup>.

224

225 To test the hypothesis of OSN activity influencing OSN lifespan in a *Bax*-dependent manner, we used  
226 *Bax*<sup>-/-</sup> mice<sup>27</sup>. Compared to wild-type mice, differential expression analysis of RNA sequenced whole  
227 olfactory mucosa tissues from sex-separated 26-week-old *Bax*<sup>-/-</sup> male and female mice revealed an  
228 overall lack of the sexually dimorphic expression of *Olfr910*, *Olfr912*, and *Olfr1295* (Figure 7A).

229 Additionally, *in situ* hybridization probing for the proportional abundance of OSNs expressing  
230 *Olfr910/912* and *Olfr1295* demonstrated non-significant differences in sex-separated *Bax*<sup>-/-</sup> male and  
231 female mice by 43 weeks age (Figure 7B-E). Altogether, these results suggest that OSN activity, by  
232 olfactory experience, influences OSN population dynamics to ultimately sculpt and shape OR  
233 representations by altering sensory neuron lifespans.

234

## 235 **Discussion**

236 Using a series of complimentary but independent approaches, we have identified a subpopulation of  
237 OSNs, defined by specific OR expression, to exhibit sexual dimorphism and experience-dependent  
238 plasticity. We have identified female mice, in the absence of a male, exhibit an over-representation of  
239 OSNs expressing *Olfr910/912*, and *Olfr1295*. Long-term cohabitation of a female mouse with a male  
240 mouse led to the attenuation of these over-represented ORs. To confirm an OSN activity-dependent  
241 component of this experience, we demonstrate this subpopulation of OSNs is not only activated by the  
242 natural scent of mature male mice, but is also exquisitely and robustly responsive to the previously  
243 identified male-specific semiochemicals SBT and MTMT. Finally, the observation that sex-separated  
244 *Bax*<sup>-/-</sup> mice fail to generate robust sexual dimorphisms suggest a role of cell death in generating our  
245 observed differences in the proportional number of OSNs expressing *Olfr910/912* and *Olfr1295* in sex-  
246 separated male and female mice.

247

### 248 **Olfactory experience as a mechanism to influence OSN population dynamics**

249 Given the capacity of the MOE to regenerate throughout the life of an animal<sup>28</sup>, it has been suggested  
250 activity-mediated mechanisms may “individualize” the olfactory system by influencing OSN population  
251 dynamics<sup>14</sup>. While we acknowledge cohabitation of the opposite sexes induces a number of changes in  
252 the nervous system of mice (compared to sex-separation)<sup>2,3</sup>, we propose that changes in OSN  
253 population dynamics, following cohabitation, for OSNs expressing *Olfr910/912* and *Olfr1295*, are in  
254 part mediated by olfactory experience with SBT and MTMT. The lengthy timeframes necessary to  
255 generate the differences that we observe are consistent with the hypothesis of modulation of OSN  
256 lifespan by activity. Nonetheless, we cannot rule out contributions of experience on OSN neurogenesis  
257 rates or OR gene choice. Questions regarding the individual contributions, or non-contributions, of OSN  
258 development and lifespan to generate this dimorphism remain open.

259

260 Additionally, the form of plasticity we observe appears to employ a distinct mechanism from reports of  
261 fear conditioning influencing the proportional abundance of OSNs expressing ORs responsive to the  
262 fear-conditioned odor<sup>29-31</sup>. In the case of fear conditioning to acetophenone, the number of OSNs  
263 expressing M71 appears to profoundly upregulate within just 3 weeks. In contrast, even by 9 weeks (~6  
264 weeks post-weaning), the difference in the expression of *Olf910* and *Olf912* appear to be insignificant  
265 in male versus female mice. Altogether, these observations lead us to speculate the existence of a  
266 multitude of distinct mechanisms, operating at non-identical time scales, to influence OSN population  
267 dynamics. Future work to identify and demonstrate these mechanisms is necessary to deepen our  
268 understandings of these phenomena and experience-dependent plasticity.

269

270 **A decrease in male-specific semiochemical responsive OSNs in females following sex-combined**  
271 **housing**

272 The finding of over-represented OSN subpopulations robustly responsive to male-specific  
273 semiochemicals, in sex-separated females, to decrease in proportional abundance following sex-  
274 combined housing, while consistent with recent literature<sup>14,23,24</sup>, is unexpected. The results suggest  
275 that once females receive exposure to male-specific semiochemicals, their detectability for  
276 semiochemicals slowly decreases over time, reflecting a potential homeostatic “gain control”  
277 mechanism for salient cue detection at the level of primary sensory neurons.

278

279 Our further finding that sex-separated *Bax*<sup>-/-</sup> mice to not exhibit sexual dimorphism point towards a  
280 potential role of activity-dependent changes in neural lifespan in generating sexually dimorphic OR  
281 expression in sex-separated wild-type mice. Though *Bax* would certainly exert experience-independent  
282 effects in a mouse, we speculate the lack of robust sexual dimorphism in sex-separated *Bax*<sup>-/-</sup> mice to  
283 be a result of the lack of *Bax*-regulated activity-dependent alteration of sensory neuron lifespan.

284

## 285 **Sexual dimorphism in OSNs responsive to semiochemicals**

286 Plasticity within the OSN population can be postulated to enable adaptation of an individual's olfactory  
287 system for the sensitive detection of salient odors, which may vary from one environment to another.  
288 While sex-specific chemical cues have been implicated in instinctual behaviors and physiology<sup>16,20,32-38</sup>,  
289 the degree to which animals are exposed to these chemical cues in nature may vary substantially  
290 among individuals.

291  
292 A recent report by van der Linden et al. 2018 also identified sexually dimorphic expression of a subset  
293 of ORs using a combination of sequencing and histology-based approaches<sup>24</sup>. Our data agree in the  
294 following manner: identification of the sexually dimorphic expression of *Olf910*, *Olf912*, *Olf1295*,  
295 *and Olf1437* in mice housed in a sex-separated manner, demonstration of activation of OSNs  
296 expressing *Olf910*, *Olf912*, and *Olf1295* following exposure to mature male mice, and a general lack  
297 of sexually dimorphic ORs in mice housed in a sex-combined manner. Together, our findings of  
298 experience to influence OSN population dynamics suggest a role in adjusting an animal's sensitivity to  
299 the salient chemical cues of male mice.

300  
301 Our identification of the semiochemicals SBT and MTMT as robust agonists for *Olf910*, *Olf912*, and  
302 *Olf1295* posit a number of intriguing speculations. Remarkably, other ORs activated by SBT and MTMT  
303 did not exhibit sexual dimorphism. Furthermore, when we tested other sex-specific and sex-enriched  
304 odorants, we did not observe activation of OSNs expressing *Olf910*, *Olf912*, or *Olf1295*  
305 (Supplementary Figure 1), nor did cognate receptors for these other odors exhibit sexually dimorphic  
306 expression (Supplementary Figure 2). These results altogether lead us to hypothesize a specialized role  
307 for *Olf910*, *Olf912*, and *Olf1295* in conveying a salient signal from the olfactory periphery to the  
308 central nervous system.

309

310 The identification of a subpopulation of OSNs to also be plastic and robustly responsive to male-  
311 specific semiochemicals also raise speculations about the flexibility of an individual's behavioral  
312 responses to semiochemicals. That is, while behavioral and physiological responses to semiochemicals  
313 have traditionally been viewed as genetically predetermined and "hardwired", there may exist a  
314 significant context and experience-dependent flexibility. For example, it has been previously shown  
315 that group housed sex-separated female mice exhibit a general suppression and irregularity in estrous  
316 cycling. Upon exposure to a mature male mouse, these unisexually grouped female mice often rapidly  
317 and synchronously enter into estrus (Whitten effect)<sup>39-43</sup>. Past implications of SBT also inducing the  
318 Whitten effect<sup>16</sup>, and our finding of *Olfcr910* and *Olfcr912* to be robustly responsive to SBT and over-  
319 represented in sex-separated female mice, lead us to speculate that the over-representation of these  
320 ORs to serve to enhance SBT detection for mediation of the Whitten effect. Past implications of MTMT  
321 influencing female mouse attractive behaviors<sup>18</sup>, and our finding of *Olfcr1295* to be robustly responsive  
322 to MTMT and over-represented in sex-separated female mice, lead us to speculate over-representation  
323 of this OR to serve to enhance MTMT detection for mediating attractive responses. Testing these, as  
324 well as many other possibilities, to link semiochemicals to behavioral and physiological outputs, at the  
325 level of molecules, cells, and circuits, remain outstanding.

326

## 327 **Methods**

### 328 **Animal husbandry**

329 Wild-type C57BL/6J (Jackson Labs 000664) and *Bax*<sup>-/-</sup> (Jackson Labs 002994) were bought and  
330 maintained at institutional facilities. Procedures of animal handling and tissue harvesting were  
331 approved by the Institutional Animal Care and Use Committee of Duke University. Animals were killed  
332 within 7 days of the ages reported in this study. Sex-separated male and female mice were socially  
333 housed with 2-5 animals per cage. Sex-combined cages contained 1 male and 1 female. All sex-

334 combined cages produced litters. Pups were aged to P21-P28 before being weaned or used for

335 independent experiments.

336

337 3 male and 3 female biological replicates were used in each condition to sequence wild-type and *Bax*<sup>-/-</sup>

338 whole olfactory mucosa tissues (MOE + other tissues in the nose). 3 male and 3 female wild-type mice

339 were used in each condition to examine MOE *in situ*. 2-3 male and female *Bax*<sup>-/-</sup> mice were used to

340 examine MOE *in situ*. 2-6 sections per mouse were imaged, quantified, and reported as individual data

341 points for each condition.

342

### 343 **Preparation of olfactory tissues for RNA-Seq**

344 Whole olfactory mucosa was rapidly collected in 5 mL tubes and flash-frozen in liquid nitrogen from

345 mice killed by CO<sub>2</sub> asphyxiation and decapitation. Tissues were kept frozen at -80°C until time of RNA

346 extraction. To extract RNA, 1 mL of TRIzol (Life Technologies 15596026) was added to frozen tissue

347 followed by homogenization until no large pieces were readily identifiable. Homogenized tissue was

348 transferred to new 1.5 mL tubes and centrifuged at max speed for 10 minutes. Supernatant was then

349 transferred to new 1.5 mL tubes containing 0.2 mL chloroform and vortexed for 3 minutes. Samples

350 were again centrifuged at max speed for 15 minutes and the aqueous phase was transferred to new

351 tubes containing 0.5 mL of isopropanol. Samples were incubated at room temperature for 5 minutes

352 and then centrifuged at max speed for 10 minutes. Supernatant was decanted and the visible pellet

353 was washed 150 µL of 75% ethanol, centrifuged, and washed again with 180 µL of 75% ethanol. After

354 centrifugation, ethanol wash was pipetted away and RNA pellets were allowed to air-dry with tube lids

355 kept open for 10 minutes. Pellets were then dissolved in RNase-free water by heating to 55°C for 10

356 minutes. RNA concentration was quantified using a QUBIT HS RNA Assay Kit (Q32855).

357

358 88  $\mu$ L of sample was subjected to RNase-free DNaseI treatment by the addition of 10  $\mu$ L of 10X Buffer  
359 and 2  $\mu$ L of RNase-free DNaseI (Roche 04 716 728 001) for 30 minutes at 37°C. Following DNaseI  
360 treatment, samples were subjected to a modified RNeasy mini protocol for RNA cleanup (Qiagen  
361 74104). 350  $\mu$ L of buffer RLT was added to the 100  $\mu$ L sample, mixed and centrifuged. Then, 250  $\mu$ L  
362 ethanol was added, mixed, and immediately transferred to a mini-column. Sample loaded columns  
363 were centrifuged for 30 seconds. 500  $\mu$ L of ethanol diluted buffer RPE was then used to wash the  
364 column twice, and sample was eluted in new 1.5 mL tubes with 100  $\mu$ L of RNase-free water. Presence  
365 of RNA was confirmed by the QUBIT HS RNA Assay Kit.

366  
367 Amplified cDNA from RNA was prepared using a SMART-Seq v4 Ultra Low Input RNA Kit (Takara  
368 634898) protocol as per the manufacturer's guidelines. In the case of whole olfactory epithelium  
369 sequencing, 2 rounds of cDNA amplification were used with 1000 ng of input RNA. DNA libraries were  
370 prepared using a half-sized Nexterra XT DNA Library Preparation Kit (Illumina 15032354) protocol as  
371 per the manufacturer's guidelines. Libraries were sequenced on either HiSeq 2000/2500 (50 base pair  
372 single read mode) or NextSeq 500 (75 base pair single read mode) with 6-12 pooled indexed libraries  
373 per lane. Reads were aligned and quantified using STAR and RSEM using custom-written code allowing  
374 up to 10 read multi-mapping events per transcript. Differential expression analysis was performed with  
375 custom-written code in R using a combination of DESeq and EdgeR. Intact Olfrs were filtered, and p-  
376 values were then re-corrected by FDR.

377  
378 **Cloning of ORs and generation of anti-sense RNA probes**  
379 Mouse ORs were cloned with sequence information from NCBI. OR ORFs were amplified from genomic  
380 DNA using Phusion (ThermoFisher F530S) as per the manufacturer's guidelines. Amplified fragments



381 were cloned into pCI expression vectors (Promega E1731) containing the first 20 residues of human  
382 rhodopsin (Rho-pCI) and were verified by sequencing.

383

384 To generate anti-sense digoxigenin (DIG)-RNA probes, ORFs were amplified (Qiagen 203203) from Rho-  
385 pCI vectors and purified via a MinElute Kit (Qiagen 28004) using manufacturer protocols with an added  
386 T3 polymerase promoter sequence at the 3' end. Anti-sense RNA was then *in vitro* transcribed using a  
387 T3 RNA polymerase (Promega P2083) and a DIG RNA labeling mix (Roche 11277073910) using  
388 manufacturer protocols. RNA probes were then alkaline hydrolyzed (80mM NaHCO<sub>3</sub>, 120mM Na<sub>2</sub>CO<sub>3</sub>)  
389 for 60°C for 15 minutes and purified using a microcolumn (Bio-Rad 732-6223). Probe integrity was  
390 assessed by agarose gel and kept at -80°C when not in use.

391

392 To determine the specificity of OR-specific mRNA probes, coding sequences of ORs were retrieved  
393 from NCBI Nucleotide and compared to other transcripts in the mouse by NCBI BLAST using the RefSeq  
394 RNA database. Only *Olf983* exhibited relatively high similarity to other ORs by this method. OSNs  
395 expressing *Olf983* were therefore determined by visual identification of the brightest and most  
396 intense cells positive for the anti-sense *Olf983* mRNA. Data shown probing for *Olf910/912* by *in situ*  
397 mRNA hybridization was done by anti-sense probes generated against *Olf910*. Early experiments also  
398 using probes against *Olf912* indicated similar results (not shown).

399

| NCBI Nucleotide retrieved gene sequence | Top 5 candidates | Query Cover | Percent Identical |
|-----------------------------------------|------------------|-------------|-------------------|
| Olfr910                                 | Olfr910          | 100%        | 100%              |
|                                         | Olfr912          | 99%         | 96.03%            |
|                                         | Olfr914          | 98%         | 82.58%            |
|                                         | Olfr904          | 97%         | 79.52%            |
|                                         | Olfr902          | 98%         | 76.55%            |
| Olfr912                                 | Olfr912          | 100%        | 99.89%            |
|                                         | Olfr910          | 99%         | 96.14%            |
|                                         | Olfr904          | 98%         | 79.44%            |
|                                         | Olfr917          | 95%         | 75.89%            |
|                                         | Olfr916          | 96%         | 75.71%            |
| Olfr983                                 | Olfr983          | 100%        | 100%              |
|                                         | Olfr888          | 96%         | 86.16%            |
|                                         | Olfr901          | 95%         | 86.19%            |
|                                         | Olfr890          | 96%         | 85.27%            |
|                                         | Olfr889          | 97%         | 84.64%            |
| Olfr1295                                | Olfr1295         | 100%        | 100.00%           |
|                                         | Olfr1298         | 100%        | 87.78%            |
|                                         | Olfr1294         | 99%         | 87.69%            |
|                                         | Olfr1297         | 100%        | 86.61%            |
|                                         | Olfr1302         | 96%         | 85.46%            |

400

#### 401 **Preparation of olfactory tissues for staining and *in situ* hybridization**

402 Olfactory epithelium was rapidly dissected and frozen in embedding medium (Tissue-Tek O.C.T.

403 Compound 4583) from mice killed by CO<sub>2</sub> asphyxiation and decapitation. 18-22 μm fresh frozen

404 coronal sections were cut using a cryostat (Leica CM1850) onto microscope slides (Fisherbrand

405 Superfrost Plus 1255015) and kept at -80°C until use.

406

407 For *in situ* RNA probe hybridization, slides were brought to room temperature, dried and rapidly fixed

408 in 4% paraformaldehyde in 1x PBS (pH ~7.5) for 15 minutes. Slides were then washed twice 1x PBS and

409 submerged into a triethanolamine solution consisting of 700 mL dH<sub>2</sub>O with 8.2 mL triethanolamine.

410 1.75 mL of acetic anhydride was then added dropwise over the course of 7 minutes with constant and

411 slow stirring for a total of 10 minutes, all at room temperature. Slides were then washed with 1x PBS

412 and blocked with prehybridization solution (see components below) for 1 hour at 58°C in a humidified  
413 hybridization oven. RNA probe concentrations were then individually optimized by dilution in  
414 prehybridization buffer and pipetted directly onto slides and covered with laboratory film (Parafilm  
415 54956) for overnight hybridization at 58°C. Slides were then rinsed the next day in 72°C heated 5x SSC  
416 twice, washed twice in 72°C heated 0.2x SSC for 30 minutes per wash, and again finally washed in 1x  
417 PBS for a minimum of 5 minutes at room temperature. Slides were then blocked with 0.5% nucleic acid  
418 blocking reagent (Roche 11096176001) dissolved in a 1x PBS containing maleic acid (Sigma M0375) for  
419 30 minutes. Blocking solution was then replaced with 1:1000 horseradish peroxidase (HRP)-conjugated  
420 anti-DIG antibody (Roche 11207733910) solution diluted in the blocking medium for 45 minutes. Slides  
421 were then washed in 1x PBS three times, 10 minutes per wash, and coated with 0.1% BSA in 1x PBS.  
422 Hybridization signals were detected using tyramide signal amplification (TSA) using fluorescein  
423 (PerkinElmer) as the fluorophore diluted in 1x PBS containing 0.003% H<sub>2</sub>O<sub>2</sub> via incubation for 10  
424 minutes in darkness, all at room temperature.

425  
426 For pS6 immunostaining, slides were blocked in 5% skim milk dissolved in 1x PBS containing 0.1%  
427 Triton X-100 at room temperature for 1 hour. Blocking solution was then replaced with 1:300 anti-pS6  
428 antibody (ThermoFisher 44-923G) dissolved in blocking solution and incubated overnight at 4°C. Anti-  
429 pS6 antibody was detected using a 1:200 Cy3-conjugated secondary (Jackson Immuno 711-165-152)  
430 diluted in 5% skim milk dissolved in 1x PBS by incubation for 45 minutes in darkness. Cell nuclei were  
431 detected using a 1/10000 dilution of a 1% bisbenzimidazole (Sigma bisbenzimidazole H 33258) solution by  
432 incubation for 5 minutes at room temperature. All slides were rinsed in dH<sub>2</sub>O, cover slipped, and  
433 allowed to dry before examination under a microscope.

434

435 **Slide microscopy**

436 Z-stacked images with 2- $\mu$ m intervals between each slice were obtained at 200 $\times$  magnification using  
437 the Zeiss Axiocam MRm and upright inverted fluorescent microscope with ApoTome functionality. The  
438 filter sets used were as follows: Zeiss filter set #38 for fluorescein, #43 for Cy3, and #49 for  
439 bisbenzimidazole. For pS6 signal intensity quantification, Cy3 signals (pS6 intensity) within fluorescein  
440 positive cells (OR expression) were merged as a maximum intensity projection in ImageJ. Average pS6  
441 signal intensities within single cells were then normalized by average pS6 signal intensities across all  
442 OSNs within the same image to report a corrected pS6 signal intensity.

443

#### 444 **Odor exposures**

445 All juvenile mice used in this study were approximately 3 weeks old. Mice were habituated for 1 hour  
446 in a clean and covered single-use paper container (International Paper DFM85) in a fume hood. For  
447 odor exposure, mice were then transferred to a new paper container containing either the mature  
448 male mice (~8-weeks-old), mature female mice (~8-weeks-old), or diluted odorant for another hour.  
449 All odorant exposures in this study consisted of 10  $\mu$ L of stimulus spotted onto a cut blotting pad (VWR  
450 28298-014) placed inside an odor cassette (Tissue-Tek 0006772-01). All odorants unless otherwise  
451 stated were diluted in water, vortexed, and rapidly spotted. MTMT was diluted in ethanol. Control  
452 experiments for odor exposures consisted of exposing mice to water or ethanol spotted on blotting  
453 pads placed in odor cassettes. Odor exposure experiments on juvenile mice employed both male and  
454 female mice. Odor exposure experiments on mature mice used male and female mice at or near  
455 estrous determined by vaginal cell cytology.

456

#### 457 **Phosphorylated S6 ribosomal capture (pS6-IP)**

458 Mice used for pS6-IP were ~3 weeks old, mixed sex, littermates. Mice were killed by CO<sub>2</sub> asphyxiation  
459 and cervical dislocation. Olfactory tissue was rapidly dissected in Buffer B (2.5mM HEPES KOH pH 7.4,  
460 0.63% glucose, 100  $\mu$ g/mL cycloheximide, 5 mM sodium fluoride, 1 mM sodium orthovanadate, 1 mM

461 sodium pyrophosphate, 1 mM  $\beta$ -glycerophosphate, in Hank's balanced salt solution). Tissue pieces  
462 were then minced in 1.35 mL Buffer C (150 mM KCl, 5 mM MgCl<sub>2</sub>, 10 mM HEPES KOH pH 7.4, 0.100  $\mu$ M  
463 Calyculin A, 2 mM DTT, 100 U/mL RNAsin, 100 mg/mL, 100  $\mu$ g/mL cycloheximide, protease inhibitor  
464 cocktail, 5 mM sodium fluoride, 1 mM sodium orthovanadate, 1 mM sodium pyrophosphate, 1 mM  $\beta$ -  
465 glycerophosphate) and subsequently transferred to homogenization tubes for steady homogenization  
466 at 250 rpm three times and at 750 rpm nine times at 4°C. Samples were then transferred to a 1.5 mL  
467 LoBind tube (Eppendorf 022431021) and clarified at 2000xg for 10 minutes at 4°C. The low-speed  
468 supernatant was transferred to a new tube on ice, and to this solution was added 90  $\mu$ L of NP40 (Sigma  
469 11332473001) and 90  $\mu$ L of 1,2-diheptanoyl-sn-glycero-3-phosphocholine (DHPC, Avanti Polar Lipids:  
470 100 mg/0.69 ml). This solution was mixed and then clarified at a max speed (17000xg) for 10 minutes  
471 at 4C. The resulting high-speed supernatant was transferred to a new tube where 20  $\mu$ L was saved and  
472 transferred to a tube containing 350  $\mu$ L buffer RLT. To the remainder of the sample, 1.3  $\mu$ L of 100  
473 mg/mL cycloheximide, 27  $\mu$ L of phosphatase inhibitor cocktail (250 mM sodium fluoride, 50 mM  
474 sodium orthovanadate, 50 mM sodium pyrophosphate, 50 mM  $\beta$ -glycerophosphate) and 6 $\mu$ L of anti-  
475 pS6 antibody (Cell Signaling D68F8) was added. The sample was gently rotated for 90 minutes at 4°C.  
476 To prepare beads, 100  $\mu$ L of beads (Invitrogen 10002D) was washed 3 times with 900  $\mu$ L of buffer A  
477 (150 mM KCl, 5 mM MgCl<sub>2</sub>, 10 mM HEPES KOH pH 7.4, 10% NP40, 10% BSA), and once with 500  $\mu$ L of  
478 buffer C. Sample homogenate was added to the beads and incubated with gentle rotation for 60  
479 minutes at 4°C. Following incubation, beads were washed with 4 times with 700  $\mu$ L of buffer D (350  
480 mM KCl, 5 mM MgCl<sub>2</sub>, 10 mM HEPES KOH pH 7.4, 10% NP40, 2 mM DTT, 100 U/mL RNAsin, 100  $\mu$ g/mL  
481 cycloheximide, 5 mM sodium fluoride, 1 mM sodium orthovanadate, 1 mM sodium pyrophosphate, 1  
482 mM  $\beta$ -glycerophosphate). During the final wash, beads were moved to room temperature, wash buffer  
483 was removed, and 350 mL of buffer RLT was added. Beads were incubated in buffer RLT for 5 minutes  
484 at room temperature. Buffer RLT containing immunoprecipitated RNA was then eluted and stored at -

485 80°C until clean up using a kit (Qiagen 154025593). cDNA was generated using 11 rounds of  
486 amplification with 10 ng RNA input.

487

#### 488 **Source of odors**

489 MTMT was synthesized as previously described in Lin et al. 2005<sup>18</sup>. Racemic SBT was synthesized in two  
490 steps from 2-aminoethanol and methyl 2-methylbutanedithioate<sup>44</sup> in >80% yield according to the  
491 procedure of Abrunhosa et al. 2001<sup>45</sup>. The final product showed high purity by gas chromatography, <sup>1</sup>H  
492 and <sup>13</sup>C NMR, and mass spectroscopic data; excellent agreement with reported parameters for this  
493 compound in Tashiro et al. 1999<sup>46</sup>. DHB was synthesized as previously described in Wiesler et al.  
494 1984<sup>47</sup>. β-caryophyllene (Sigma W225207), 2,5-DMP (Sigma 175420), 2-heptanone (Sigma W254401),  
495 (E)-β-farnesene (Bedoukian P3500-90) were purchased.

496 Figure 1.

- 497 A. Schematic of the housing setup. For sex-separation, male mice were housed exclusively with  
498 male mice. Female mice were housed exclusively with female mice.
- 499 B. Volcano plot comparing expression of *Olfrs* between 3-week-old sex-separated male and  
500 female mice. The red dashed line indicates an FDR = 0.05.
- 501 C. Volcano plot comparing expression of *Olfrs* between 9-week-old sex-separated male and  
502 female mice. The red dashed line indicates an FDR = 0.05.
- 503 D. Volcano plot comparing expression of *Olfrs* between 26-week-old sex-separated male and  
504 female mice. The red dashed line indicates an FDR = 0.05.
- 505 E. Volcano plot comparing expression of *Olfrs* between 43-week-old sex-separated male and  
506 female mice. The red dashed line indicates an FDR = 0.05.
- 507 F. Longitudinal plotting of the proportions of reads aligned to *Olf910*, *Olf912*, and *Olf1295*.  
508 Proportions were calculated by comparing reads mapped to the specific *Olfrs* compared to  
509 those mapped to other *Olfrs*.

510

511 Figure 2.

- 512 A. Representative *in situ* hybridization picture probing for the expression of *Olf910/912* in 43-  
513 week-old sex-separated male (top) and female (bottom) mice. Scale bars indicate 50  $\mu$ m.
- 514 B. Summary data showing the proportion of OSNs expressing *Olf910/912* between 43-week-old  
515 male and female mice. An unpaired two-tailed t-test revealed statistical difference ( $p < 0.0001$ )  
516 between males and females.
- 517 C. Representative *in situ* hybridization picture probing for the expression of *Olf1295* in 43-week-  
518 old sex-separated male (top) and female (bottom) mice. Scale bars indicate 50  $\mu$ m.

519 D. Summary data showing the proportion of OSNs expressing *Olfr1295* between 43-week-old male  
520 and female mice. An unpaired two-tailed t-test revealed statistical difference ( $p < 0.01$ )  
521 between males and females.

522

523 Figure 3.

524 A. Schematic of exposure experiment. A juvenile mouse (black) was exposed to (in descending  
525 order) a clean environment, four adult male mice, four adult female mice, or 1% (v/v)  
526 acetophenone for 1 hour in a sealed container.

527 B. Representative *in situ* hybridizations and pS6 immunostaining showing colocalization events  
528 between cells expressing *Olfr910/912* and pS6 signal induction following exposure of a juvenile  
529 mouse to adult male mice. Scale bars indicate 20  $\mu\text{m}$ .

530 C. Summary data showing pS6 induction in cells expressing *Olfr910/912* following exposure of a  
531 juvenile mouse to multiple stimuli. One-way ANOVA with Dunnett's multiple comparisons test  
532 correction reveals only exposure to the adult male to lead to significant ( $p < 0.0001$ ) pS6  
533 induction within cells expressing *Olfr910/912*.

534 D. Representative *in situ* hybridizations and pS6 immunostaining showing colocalization events  
535 between cells expressing *Olfr1295* and pS6 signal induction following exposure of a juvenile  
536 mouse to adult male mice. Scale bars indicate 20  $\mu\text{m}$ .

537 E. Summary data showing pS6 induction in cells expressing *Olfr1295* following exposure of a  
538 juvenile mouse to multiple stimuli. One-way ANOVA with Dunnett's multiple comparisons test  
539 correction reveals only exposure to the adult male to lead to significant ( $p < 0.05$ ) pS6 induction  
540 within cells expressing *Olfr1295*.

541

542 Figure 4.



- 543 A. Schematic of the pS6-IP-Seq experiment. Litter matched, ~3-week-old mice are used. Mice are  
544 habituated to an odor-free environment for one hour. One mouse then receives exposure to an  
545 odor stimulus, while another receives exposure to the diluent for another hour. Olfactory  
546 tissues are then harvested and immunoprecipitated using an antibody against pS6.
- 547 B. The battery of sex-specific and sex-enriched volatiles screened using pS6-IP-Seq.
- 548 C. Volcano plot showing the results of pS6-IP-Seq using 0.01% (v/v) SBT diluted in water as  
549 stimulus. The red dashed line indicates an FDR = 0.05.
- 550 D. Representative *in situ* hybridizations and pS6 immunostaining showing colocalization events  
551 between cells expressing *Olf910/912* and pS6 signal induction following exposure of a juvenile  
552 mouse to 1% (v/v) SBT diluted in water. Scale bars indicate 20  $\mu\text{m}$ .
- 553 E. Summary data showing pS6 induction in cells expressing *Olf910/912* following exposure of a  
554 juvenile mouse to increasing concentrations of SBT and acetophenone. One-way ANOVA with  
555 Dunnett's multiple comparisons test correction reveals only exposure to 0.01% SBT, 0.1% SBT,  
556 and 1% SBT to lead to significant pS6 induction within cells expressing *Olf910/912* (\*\*\*\*  $p <$   
557  $0.0001$ , \*  $p < 0.05$ ).
- 558 F. Volcano plot showing the results of pS6-IP-Seq using 100  $\mu\text{M}$  MTMT dissolved in ethanol as  
559 stimulus. The red dashed line indicates an FDR = 0.05.
- 560 G. Representative *in situ* hybridizations and pS6 immunostaining showing colocalization events  
561 between cells expressing *Olf1295* and pS6 signal induction following exposure of a juvenile  
562 mouse to 10mM MTMT diluted in ethanol. Scale bars indicate 20  $\mu\text{m}$ .
- 563 H. Summary data showing pS6 induction in cells expressing *Olf1295* following exposure of a  
564 juvenile mouse to increasing concentrations of MTMT and acetophenone. One-way ANOVA  
565 with Dunnett's multiple comparisons test correction reveals only exposure to 100 $\mu\text{M}$  MTMT,

566 and 10mM MTMT to lead to significant pS6 induction within cells expressing *Olf1295* (\*\*\*\*  $p <$   
567 0.0001, \*\*  $p < 0.01$ ).

568

569 Figure 5.

570 A. Comparison of responses of 26-week-old male and female mouse OSNs expressing *Olf910/912*  
571 to various stimuli. One-way ANOVA with Tukey's multiple comparisons test correction reveals  
572 only exposure to 0.1% SBT lead to significant pS6 induction ( $p < 0.0001$ ) with no significant  
573 differences in male versus female responses.

574 B. Comparison of responses of 26-week-old male and female mouse OSNs expressing *Olf983* to  
575 various stimuli. One-way ANOVA with Tukey's multiple comparisons test correction reveals only  
576 exposure to 1% acetophenone lead to significant pS6 induction ( $p < 0.0001$ ) with no significant  
577 differences in male versus female responses.

578 C. Comparison of responses of 26-week-old male and female mouse OSNs expressing *Olf1295* to  
579 various stimuli. One-way ANOVA with Tukey's multiple comparisons test correction reveals only  
580 exposure to 10mM MTMT lead to significant pS6 induction ( $p < 0.0001$ ). A subtle but  
581 significantly greater response was observed in the female compared to the male ( $p < 0.05$ ).

582

583 Figure 6.

584 A. Schematic of the housing setup. For sex-combined housing, one male mouse was housed with  
585 one female mouse.

586 B. Volcano plot comparing expression of *Olfrs* between 43-week-old sex-combined male and  
587 female mice. The red dashed line indicates an FDR = 0.05.

588 C. Longitudinal plotting of the proportions of reads aligned to *Olf910*, *Olf912*, and *Olf1295* of  
589 male and female mice comparing sex-separation and sex-combined housing.

- 590 D. Representative *in situ* hybridization picture probing for the expression of *Olfr910/912* in 43-  
591 week-old sex-combined male (top) and female (bottom) mice. Scale bars indicate 50  $\mu\text{m}$ .
- 592 E. Summary data showing the proportion of OSNs expressing *Olfr910/912* between 43-week-old  
593 male and female mice housed either in a sex-separated or sex-combined fashion. One-way  
594 ANOVA with Tukey's multiple comparisons test correction reveals only sex-separated female  
595 mice to differ in the proportions of OSNs expressing *Olfr910/912* from the others ( $p < 0.0001$ ,  
596 all comparisons).
- 597 F. Representative *in situ* hybridization picture probing for the expression of *Olfr1295* in 43-week-  
598 old sex-combined male (top) and female (bottom) mice. Scale bars indicate 50  $\mu\text{m}$ .
- 599 G. Summary data showing the proportion of OSNs expressing *Olfr1295* between 43-week-old male  
600 and female mice housed either in a sex-separated or sex-combined fashion. One-way ANOVA  
601 with Tukey's multiple comparisons test correction reveals only sex-separated female mice to  
602 differ in the proportions of OSNs expressing *Olfr910/912* from the others ( $p < 0.001$ , sex-  
603 separated male vs sex-separated female,  $p < 0.0001$  all others).

604

605 Figure 7.

- 606 A. Volcano plot comparing expression of *Olfers* between 26-week-old, *Bax* null, sex-separated male  
607 and female mice. The red dashed line indicates an FDR = 0.05.
- 608 B. Representative *in situ* hybridization picture probing for the expression of *Olfr910/912* in 43-  
609 week-old, *Bax* null, sex-separated male (top) and female (bottom) mice. Scale bars indicate 50  
610  $\mu\text{m}$ .
- 611 C. Summary data showing the proportion of OSNs expressing *Olfr910/912* between 43-week-old,  
612 *Bax* null, sex-separated male and female mice. An unpaired two-tailed t-test reveals no  
613 statistical difference ( $p > 0.05$ ) between males and females.

- 614 D. Representative *in situ* hybridization picture probing for the expression of *Olfr1295* in 43-week-  
615 old, *Bax* null, sex-separated male (top) and female (bottom) mice. Scale bars indicate 50  $\mu$ m.  
616 E. Summary data showing the proportion of OSNs expressing *Olfr1295* between 43-week-old, *Bax*  
617 null, sex-separated male and female mice. An unpaired two-tailed t-test reveals no statistical  
618 difference ( $p > 0.05$ ) between males and females.

619  
620 Supplementary Figure 1. Volcano plots showing the results of pS6-IP-Seq against the battery of  
621 odorants. The red dashed line indicates an FDR = 0.05. For SBT and MTMT, pS6-IP-Seq results of  
622 concentrations higher than the ones reported in Figure 4 are shown as well. Among the tested  
623 odorants, only SBT and MTMT exposure lead to the enrichment of transcripts for *Olfr910*, *Olfr912*, and  
624 *Olfr1295*.

625  
626 Supplementary Figure 2. To show that sex-specific receptor expression is limited to ORs robustly  
627 responsive to SBT and MTMT, the top 5 candidate receptors for 3,4-dehydro-*exo*-brevicommin, 2,5-  
628 dimethylpyrazine, (E)- $\beta$ -farnesene, and 2-heptanone are highlighted and shown to not exhibit sexually  
629 dimorphic expression.

630  
631 Supplementary Figure 3. To show our observations of sexual dimorphism in the MOE are not a sex-  
632 biased observation, we investigated *Olfr1437*, a male-enriched OR.

- 633 A. Volcano plot comparing expression of *Olfrs* between 43-week-old sex-separated male and  
634 female mice. The red dashed line indicates an FDR = 0.05. *Olfr1437*, a male-enriched OR is  
635 highlighted.  
636 B. Representative *in situ* hybridization picture probing for the expression of *Olfr1437* in 43-week-  
637 old sex-separated male (top) and female (bottom) mice. Scale bars indicate 50  $\mu$ m.

- 638 C. Summary data showing the proportion of OSNs expressing *Olf1437* between 43-week-old sex-  
639 separated male and female mice. An unpaired two-tailed t-test revealed statistical difference ( $p$   
640  $< 0.0001$ ) between males and females.
- 641 D. Volcano plot comparing expression of *Olfrs* between 43-week-old sex-combined male and  
642 female mice. The red dashed line indicates an FDR = 0.05. *Olf1437*, a male-enriched OR is  
643 highlighted.
- 644 E. Longitudinal plotting of the proportions of reads aligned to *Olf1437*. Proportions were  
645 calculated by comparing reads mapped to *Olf1437* compared to those mapped to other *Olfrs*.  
646

## 647 References

- 648 1 Torquet, N. *et al.* Social interactions impact on the dopaminergic system and drive individuality.  
649 *Nat Commun* **9**, 3081, doi:10.1038/s41467-018-05526-5 (2018).
- 650 2 Li, Y. *et al.* Neuronal Representation of Social Information in the Medial Amygdala of Awake  
651 Behaving Mice. *Cell* **171**, 1176-1190.e1117, doi:10.1016/j.cell.2017.10.015 (2017).
- 652 3 Remedios, R. *et al.* Social behaviour shapes hypothalamic neural ensemble representations of  
653 conspecific sex. *Nature* **550**, 388-392, doi:10.1038/nature23885 (2017).
- 654 4 Shah, N. M. *et al.* Visualizing sexual dimorphism in the brain. *Neuron* **43**, 313-319,  
655 doi:10.1016/j.neuron.2004.07.008 (2004).
- 656 5 Yang, C. F. *et al.* Sexually dimorphic neurons in the ventromedial hypothalamus govern mating  
657 in both sexes and aggression in males. *Cell* **153**, 896-909, doi:10.1016/j.cell.2013.04.017 (2013).
- 658 6 Zhao, H. & Reed, R. R. X inactivation of the OCNC1 channel gene reveals a role for activity-  
659 dependent competition in the olfactory system. *Cell* **104**, 651-660, doi:10.1016/s0092-  
660 8674(01)00262-8 (2001).
- 661 7 Zou, D. J. *et al.* Postnatal refinement of peripheral olfactory projections. *Science* **304**, 1976-  
662 1979, doi:10.1126/science.1093468 (2004).
- 663 8 Holtmaat, A. & Svoboda, K. Experience-dependent structural synaptic plasticity in the  
664 mammalian brain. *Nat Rev Neurosci* **10**, 647-658, doi:10.1038/nrn2699 (2009).
- 665 9 Buck, L. & Axel, R. A novel multigene family may encode odorant receptors: a molecular basis  
666 for odor recognition. *Cell* **65**, 175-187, doi:10.1016/0092-8674(91)90418-x (1991).
- 667 10 Zhang, X. & Firestein, S. The olfactory receptor gene superfamily of the mouse. *Nat Neurosci* **5**,  
668 124-133, doi:10.1038/nn800 (2002).
- 669 11 Jiang, Y. *et al.* Molecular profiling of activated olfactory neurons identifies odorant receptors for  
670 odors in vivo. *Nat Neurosci* **18**, 1446-1454, doi:10.1038/nn.4104 (2015).
- 671 12 Malnic, B., Hirono, J., Sato, T. & Buck, L. B. Combinatorial receptor codes for odors. *Cell* **96**, 713-  
672 723, doi:10.1016/s0092-8674(00)80581-4 (1999).
- 673 13 Khan, M., Vaes, E. & Mombaerts, P. Regulation of the probability of mouse odorant receptor  
674 gene choice. *Cell* **147**, 907-921, doi:10.1016/j.cell.2011.09.049 (2011).
- 675 14 Ibarra-Soria, X. *et al.* Variation in olfactory neuron repertoires is genetically controlled and  
676 environmentally modulated. *Elife* **6**, doi:10.7554/eLife.21476 (2017).
- 677 15 Knight, Z. A. *et al.* Molecular profiling of activated neurons by phosphorylated ribosome  
678 capture. *Cell* **151**, 1126-1137, doi:10.1016/j.cell.2012.10.039 (2012).
- 679 16 Jemiolo, B., Harvey, S. & Novotny, M. Promotion of the Whitten effect in female mice by  
680 synthetic analogs of male urinary constituents. *Proc Natl Acad Sci U S A* **83**, 4576-4579 (1986).
- 681 17 Jemiolo, B., Xie, T. M. & Novotny, M. Socio-sexual olfactory preference in female mice:  
682 attractiveness of synthetic chemosignals. *Physiol Behav* **50**, 1119-1122, doi:10.1016/0031-  
683 9384(91)90570-e (1991).
- 684 18 Lin, D. Y., Zhang, S. Z., Block, E. & Katz, L. C. Encoding social signals in the mouse main olfactory  
685 bulb. *Nature* **434**, 470-477, doi:10.1038/nature03414 (2005).
- 686 19 Lopez, F., Delgado, R., Lopez, R., Bacigalupo, J. & Restrepo, D. Transduction for pheromones in  
687 the main olfactory epithelium is mediated by the Ca<sup>2+</sup>-activated channel TRPM5. *J Neurosci* **34**,  
688 3268-3278, doi:10.1523/jneurosci.4903-13.2014 (2014).
- 689 20 Novotny, M., Harvey, S., Jemiolo, B. & Alberts, J. Synthetic pheromones that promote inter-  
690 male aggression in mice. *Proc Natl Acad Sci U S A* **82**, 2059-2061 (1985).
- 691 21 Schwende, F. J., Wiesler, D., Jorgenson, J. W., Carmack, M. & Novotny, M. Urinary volatile  
692 constituents of the house mouse, *Mus musculus*, and their endocrine dependency. *J Chem Ecol*  
693 **12**, 277-296, doi:10.1007/bf01045611 (1986).

- 694 22 Hu, X. S. *et al.* Concentration-dependent recruitment of mammalian odorant receptors. *eNeuro*  
695 *(in press.)* (2019).
- 696 23 Xu, P. S., Lee, D. & Holy, T. E. Experience-Dependent Plasticity Drives Individual Differences in  
697 Pheromone-Sensing Neurons. *Neuron* **91**, 878-892, doi:10.1016/j.neuron.2016.07.034 (2016).
- 698 24 van der Linden, C., Jakob, S., Gupta, P., Dulac, C. & Santoro, S. W. Sex separation induces  
699 differences in the olfactory sensory receptor repertoires of male and female mice. *Nat Commun*  
700 **9**, 5081, doi:10.1038/s41467-018-07120-1 (2018).
- 701 25 Santoro, S. W. & Dulac, C. The activity-dependent histone variant H2BE modulates the life span  
702 of olfactory neurons. *Elife* **1**, e00070, doi:10.7554/eLife.00070 (2012).
- 703 26 Watt, W. C. *et al.* Odorant stimulation enhances survival of olfactory sensory neurons via MAPK  
704 and CREB. *Neuron* **41**, 955-967, doi:10.1016/s0896-6273(04)00075-3 (2004).
- 705 27 Merry, D. E. & Korsmeyer, S. J. Bcl-2 gene family in the nervous system. *Annu Rev Neurosci* **20**,  
706 245-267, doi:10.1146/annurev.neuro.20.1.245 (1997).
- 707 28 Fletcher, R. B. *et al.* p63 regulates olfactory stem cell self-renewal and differentiation. *Neuron*  
708 **72**, 748-759, doi:10.1016/j.neuron.2011.09.009 (2011).
- 709 29 Dias, B. G. & Ressler, K. J. Parental olfactory experience influences behavior and neural  
710 structure in subsequent generations. *Nat Neurosci* **17**, 89-96, doi:10.1038/nn.3594 (2014).
- 711 30 Jones, S. V., Choi, D. C., Davis, M. & Ressler, K. J. Learning-dependent structural plasticity in the  
712 adult olfactory pathway. *J Neurosci* **28**, 13106-13111, doi:10.1523/jneurosci.4465-08.2008  
713 (2008).
- 714 31 Morrison, F. G., Dias, B. G. & Ressler, K. J. Extinction reverses olfactory fear-conditioned  
715 increases in neuron number and glomerular size. *Proc Natl Acad Sci U S A* **112**, 12846-12851,  
716 doi:10.1073/pnas.1505068112 (2015).
- 717 32 Ferrero, D. M. *et al.* A juvenile mouse pheromone inhibits sexual behaviour through the  
718 vomeronasal system. *Nature* **502**, 368-371, doi:10.1038/nature12579 (2013).
- 719 33 Hattori, T. *et al.* Exocrine Gland-Secreting Peptide 1 Is a Key Chemosensory Signal Responsible  
720 for the Bruce Effect in Mice. *Curr Biol* **27**, 3197-3201.e3193, doi:10.1016/j.cub.2017.09.013  
721 (2017).
- 722 34 Haga, S. *et al.* The male mouse pheromone ESP1 enhances female sexual receptive behaviour  
723 through a specific vomeronasal receptor. *Nature* **466**, 118-122, doi:10.1038/nature09142  
724 (2010).
- 725 35 Chamero, P. *et al.* Identification of protein pheromones that promote aggressive behaviour.  
726 *Nature* **450**, 899-902, doi:10.1038/nature05997 (2007).
- 727 36 Sam, M. *et al.* Odorants may arouse instinctive behaviours. *Nature* **412**, 142,  
728 doi:10.1038/35084137 (2001).
- 729 37 Haga-Yamanaka, S. *et al.* Integrated action of pheromone signals in promoting courtship  
730 behavior in male mice. *Elife* **3**, e03025, doi:10.7554/eLife.03025 (2014).
- 731 38 Fu, X. *et al.* A Molecular Code for Identity in the Vomeronasal System. *Cell* **163**, 313-323,  
732 doi:10.1016/j.cell.2015.09.012 (2015).
- 733 39 Gangrade, B. K. & Dominic, C. J. Studies of the male-originating pheromones involved in the  
734 Whitten effect and Bruce effect in mice. *Biol Reprod* **31**, 89-96, doi:10.1095/biolreprod31.1.89  
735 (1984).
- 736 40 Whitten, M. K. Effect of exteroceptive factors on the oestrous cycle of mice. *Nature* **180**, 1436,  
737 doi:10.1038/1801436a0 (1957).
- 738 41 Whitten, W. K. Modification of the oestrous cycle of the mouse by external stimuli associated  
739 with the male. *J Endocrinol* **13**, 399-404, doi:10.1677/joe.0.0130399 (1956).
- 740 42 Whitten, W. K. Occurrence of anoestrus in mice caged in groups. *J Endocrinol* **18**, 102-107,  
741 doi:10.1677/joe.0.0180102 (1959).

- 742 43 Whitten, W. K., Bronson, F. H. & Greenstein, J. A. Estrus-inducing pheromone of male mice:  
743 transport by movement of air. *Science* **161**, 584-585, doi:10.1126/science.161.3841.584 (1968).
- 744 44 Meijer, J., Vermeer, P. & Brandsma, L. A simple preparative method for dithioesters. *Rec Travel*  
745 *Chim Pays-Bas* **92**, 601-604, doi:10.1002/recl.19730920605 (1973).
- 746 45 Abrunhosa, I., Gulea, M., Levillain, J. & Masson, S. Synthesis of new chiral thiazoline-containing  
747 ligands. *Tetrahedron: Asymmetry* **12**, 2851-2859, doi:https://doi.org/10.1016/S0957-  
748 4166(01)00481-5 (2001).
- 749 46 Tashiro, T. & Mori, K. Synthesis of the Enantiomers of 2-sec-Butyl-4,5-dihydrothiazole and  
750 (1R,5S,7R)-3,4-Dehydro-exo-brevicommin, Pheromone Components of the Male Mouse, *Mus*  
751 *musculus*. *Eur J Org Chem* **1999**, 2167-2173, doi:10.1002/(sici)1099-  
752 0690(199909)1999:9<2167::Aid-ejoc2167>3.0.Co;2-I (1999).
- 753 47 Wiesler, D. P., Schwende, F. J., Carmack, M. & Novotny, M. Structural determination and  
754 synthesis of a chemical signal of the male state and a potential multipurpose pheromone of the  
755 mouse *Mus musculus*. *J Org Chem* **49**, 882-884, doi:10.1021/jo00179a025 (1984).
- 756



Figure 1

A

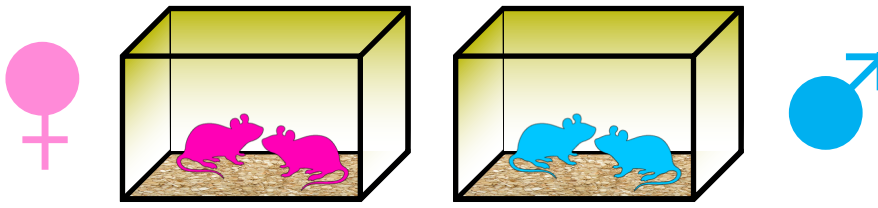

B

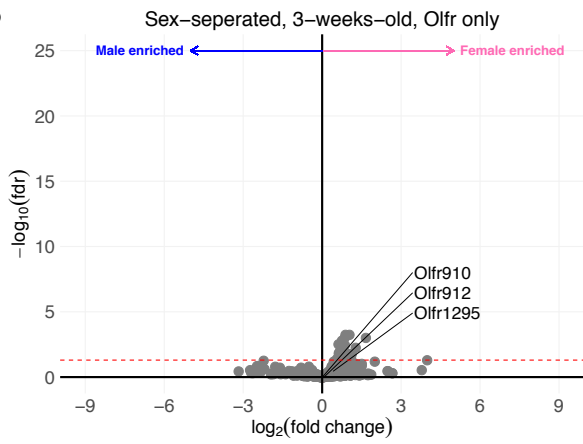

C

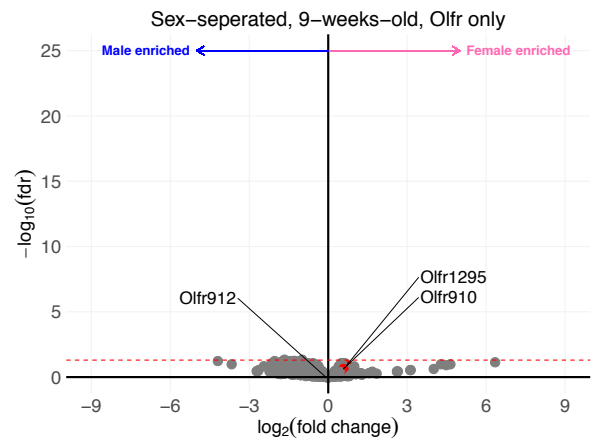

D

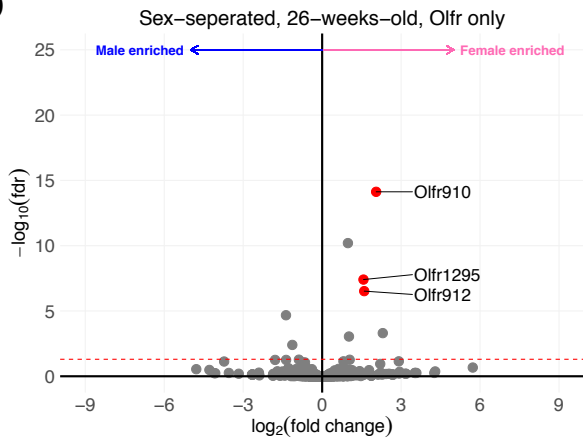

E

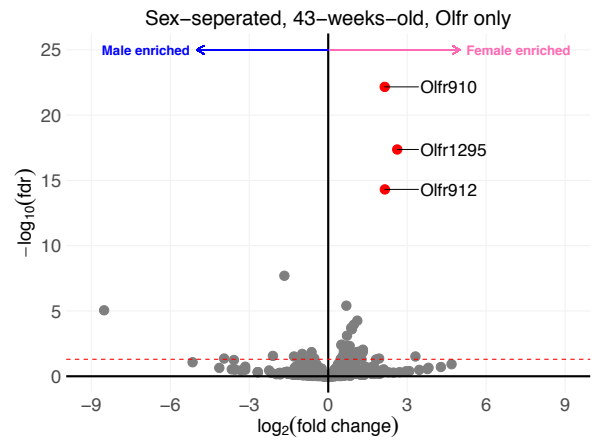

F

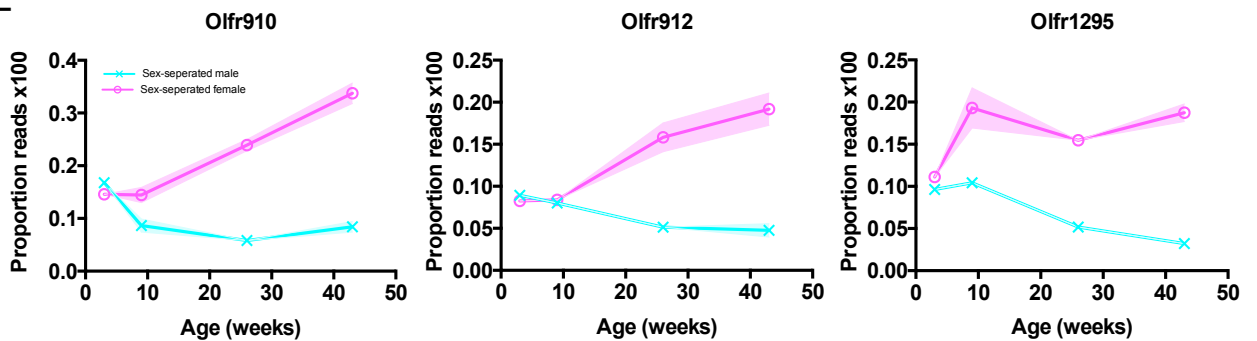

Figure 2

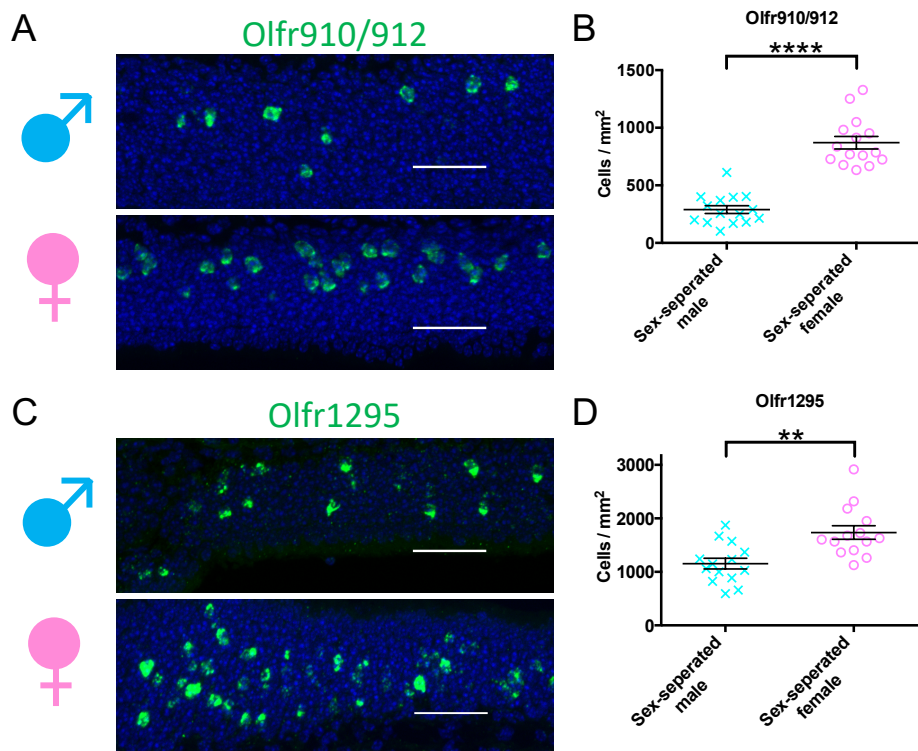

Figure 3

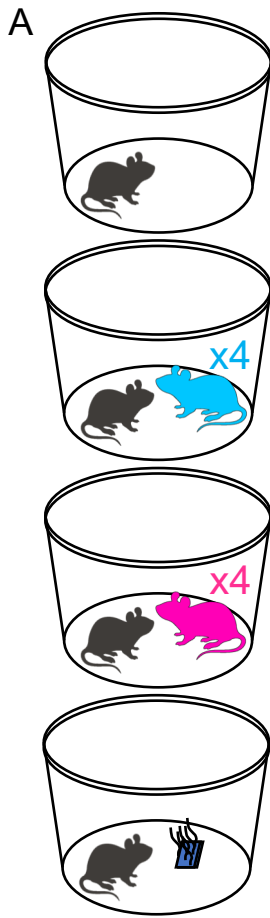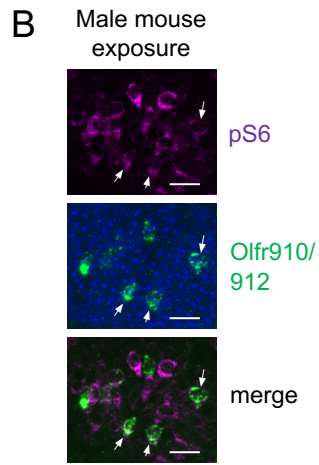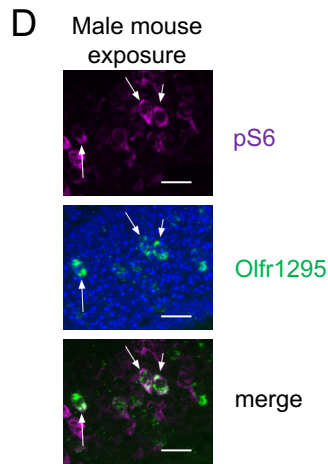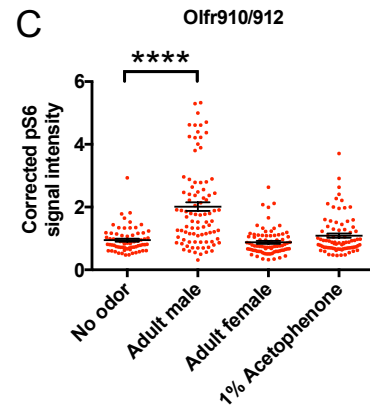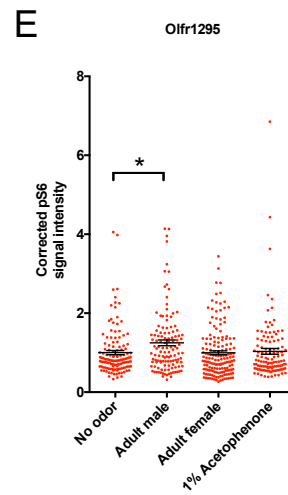

Figure 4

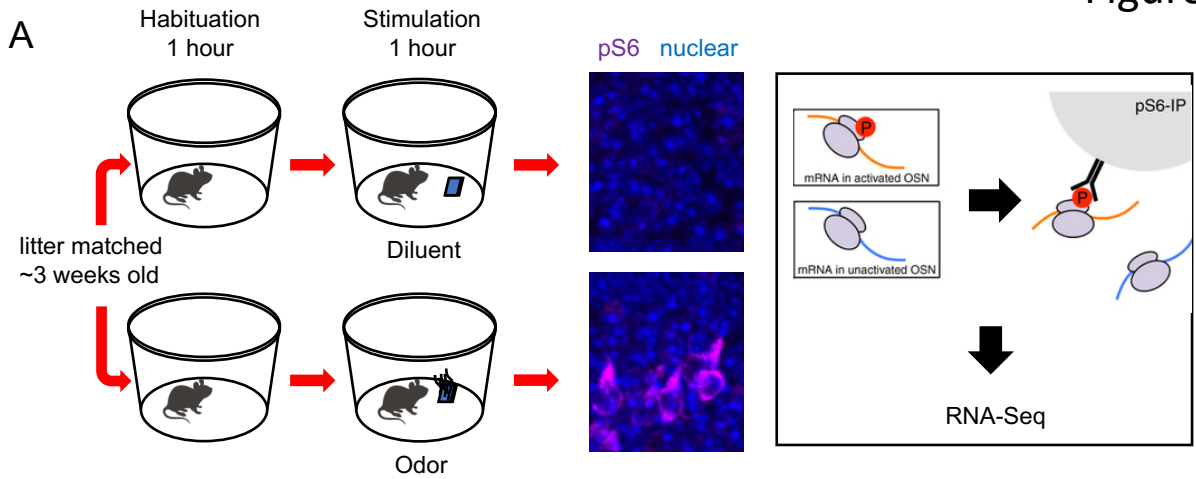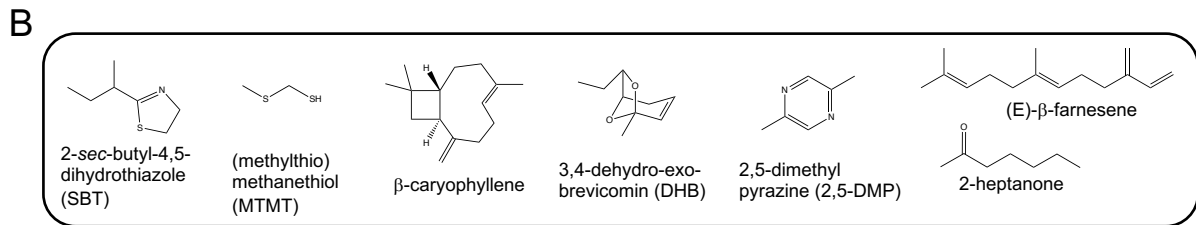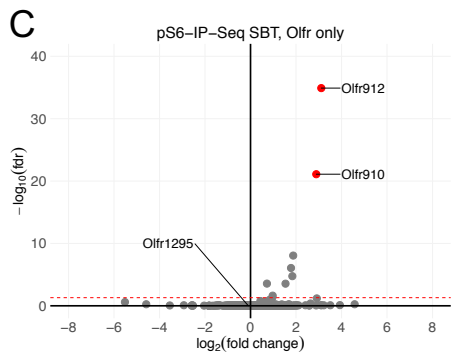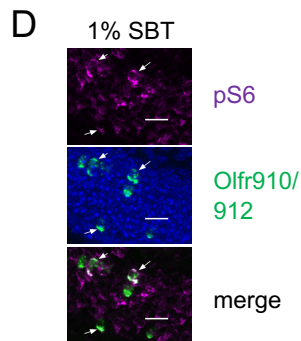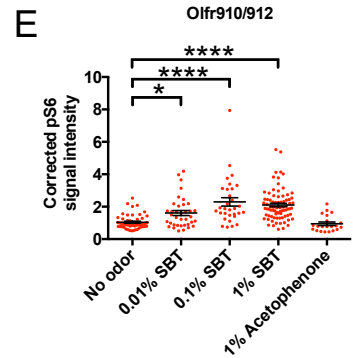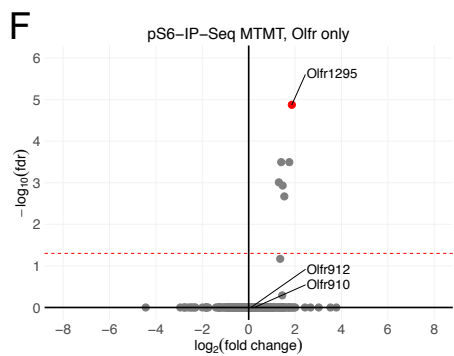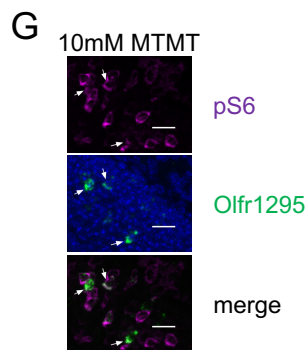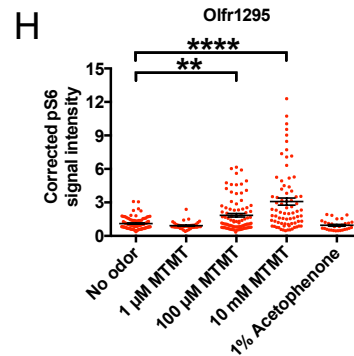

A

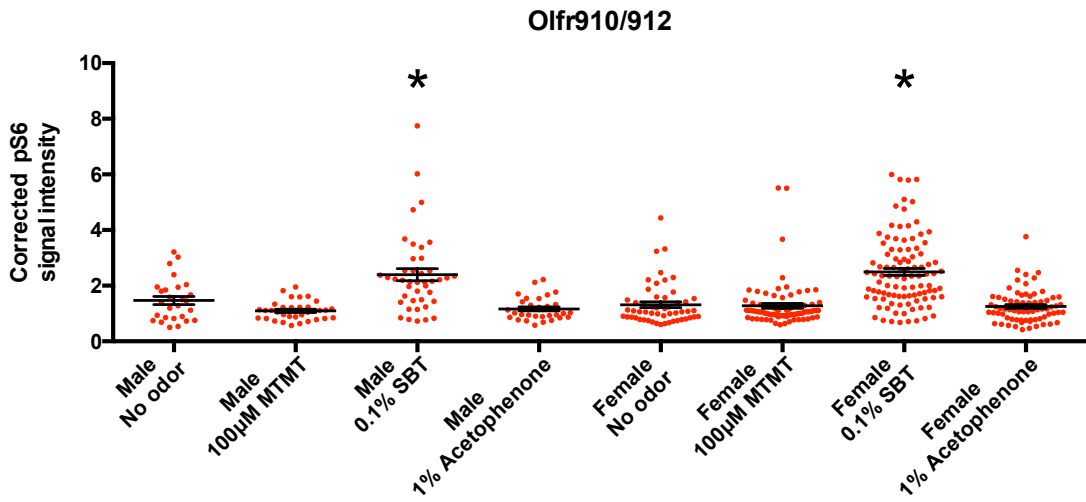

B

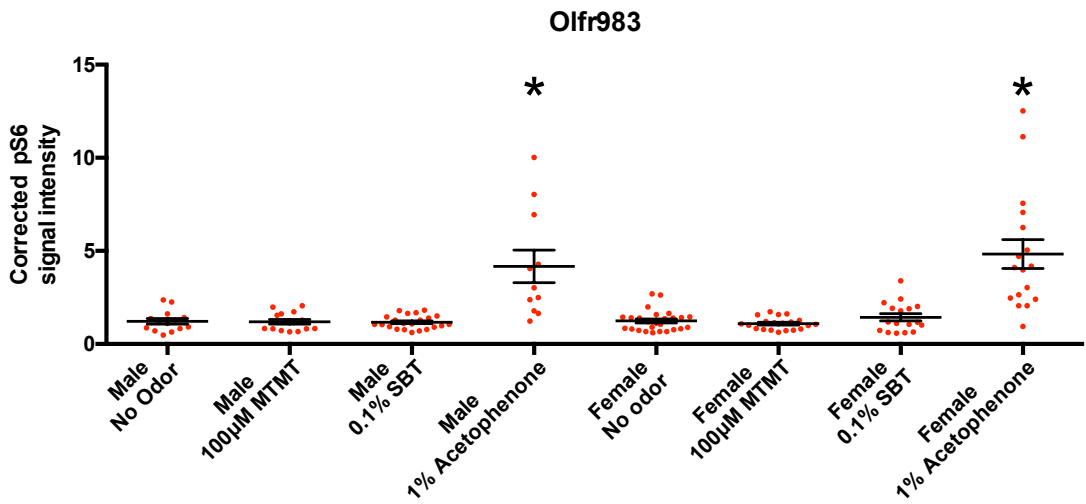

C

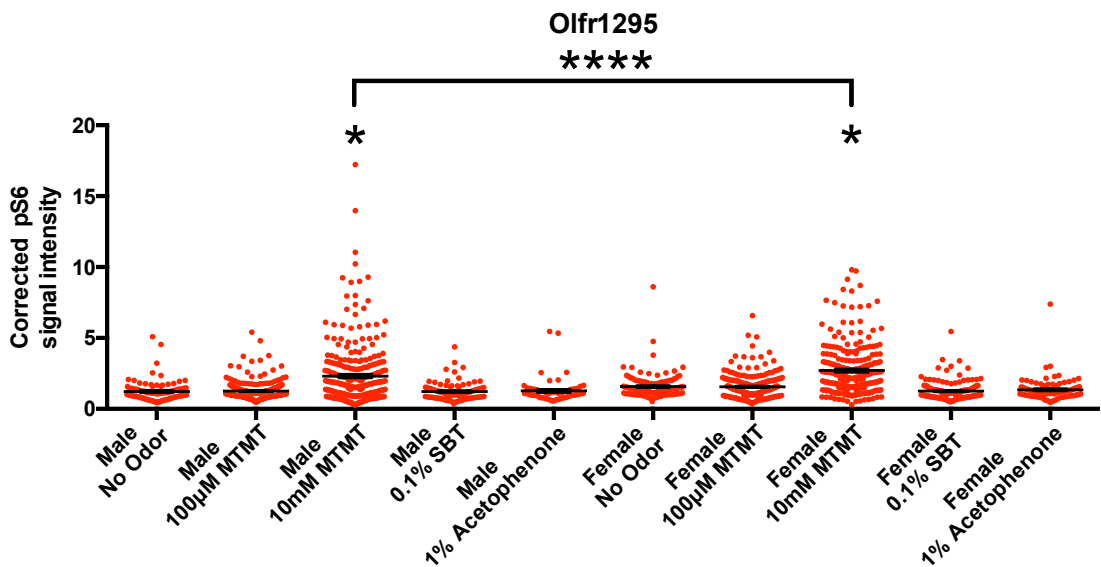

Figure 6

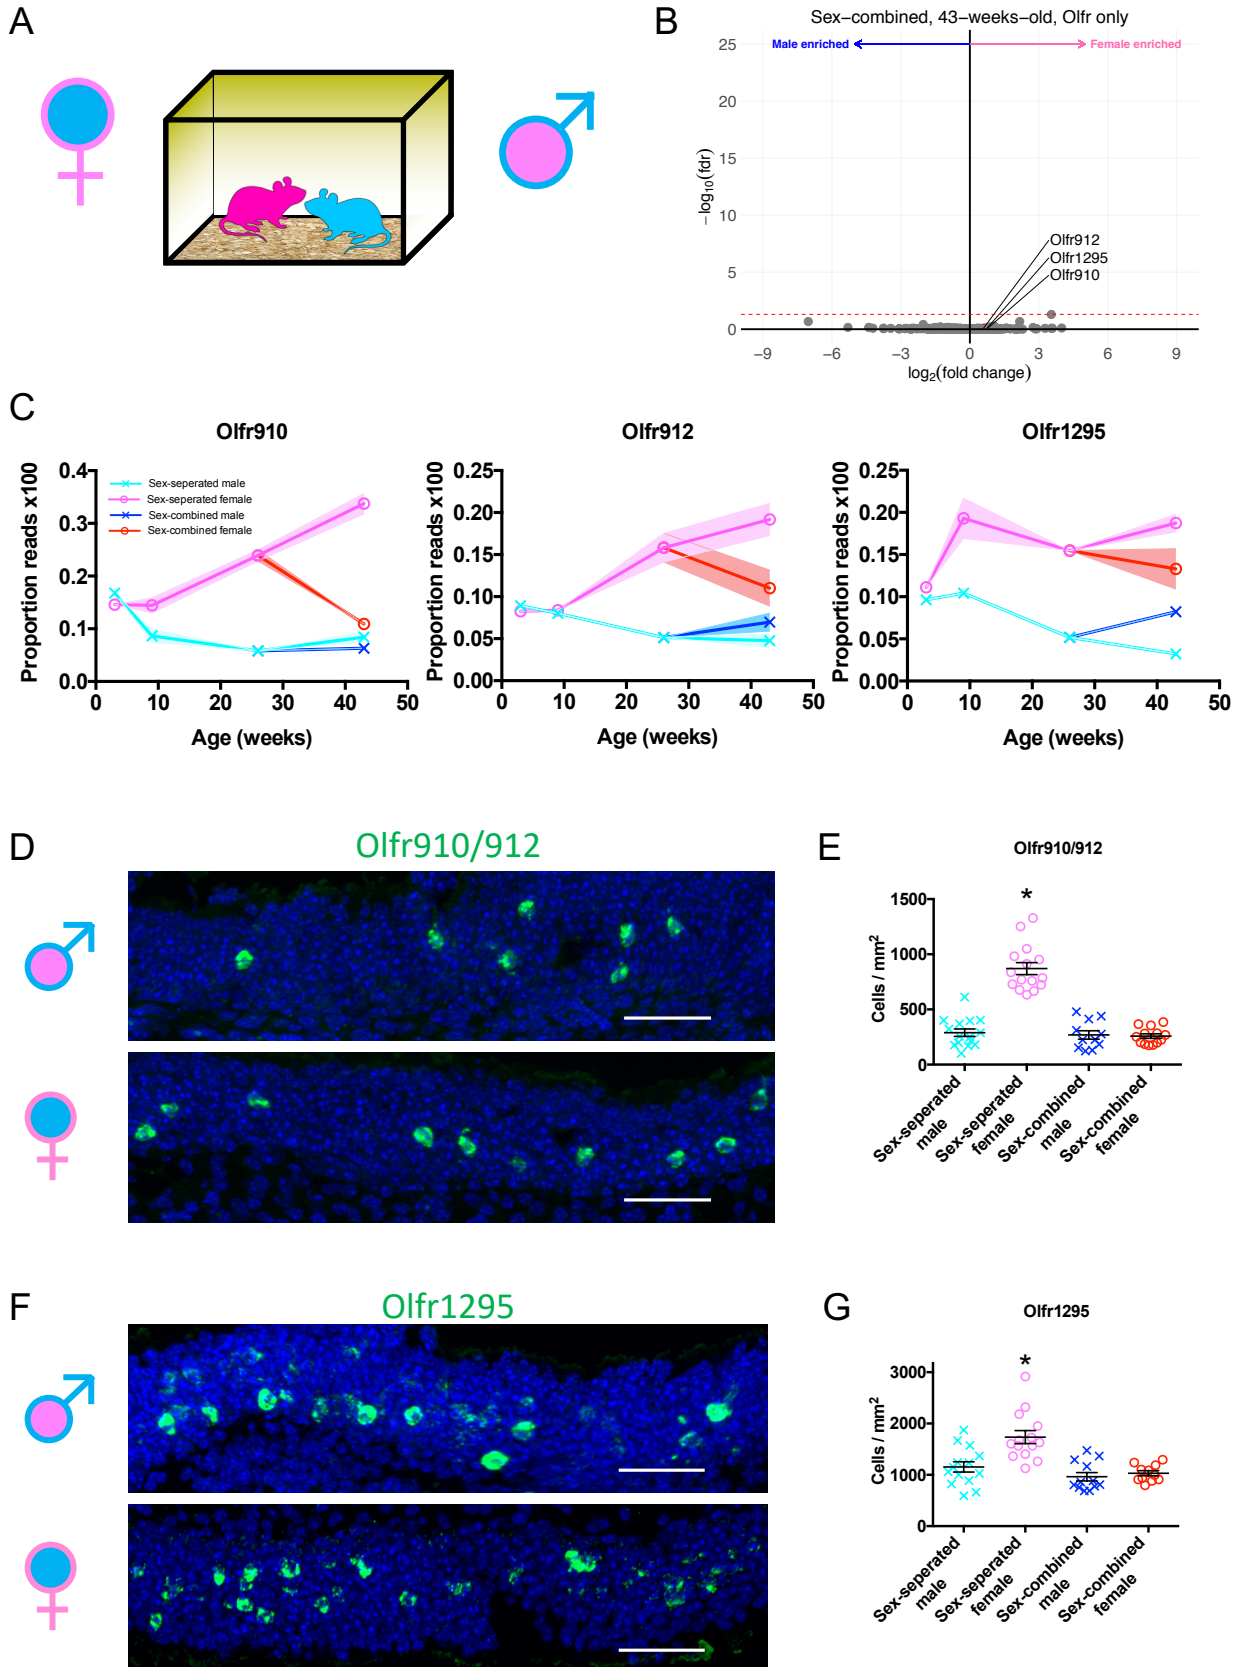

Figure 7

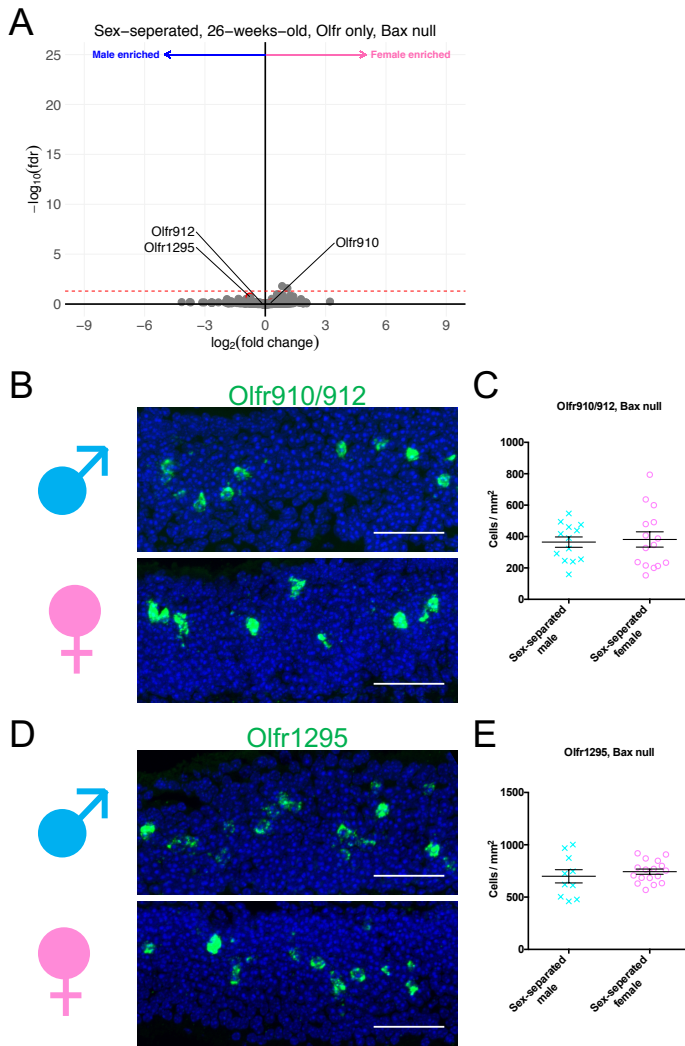

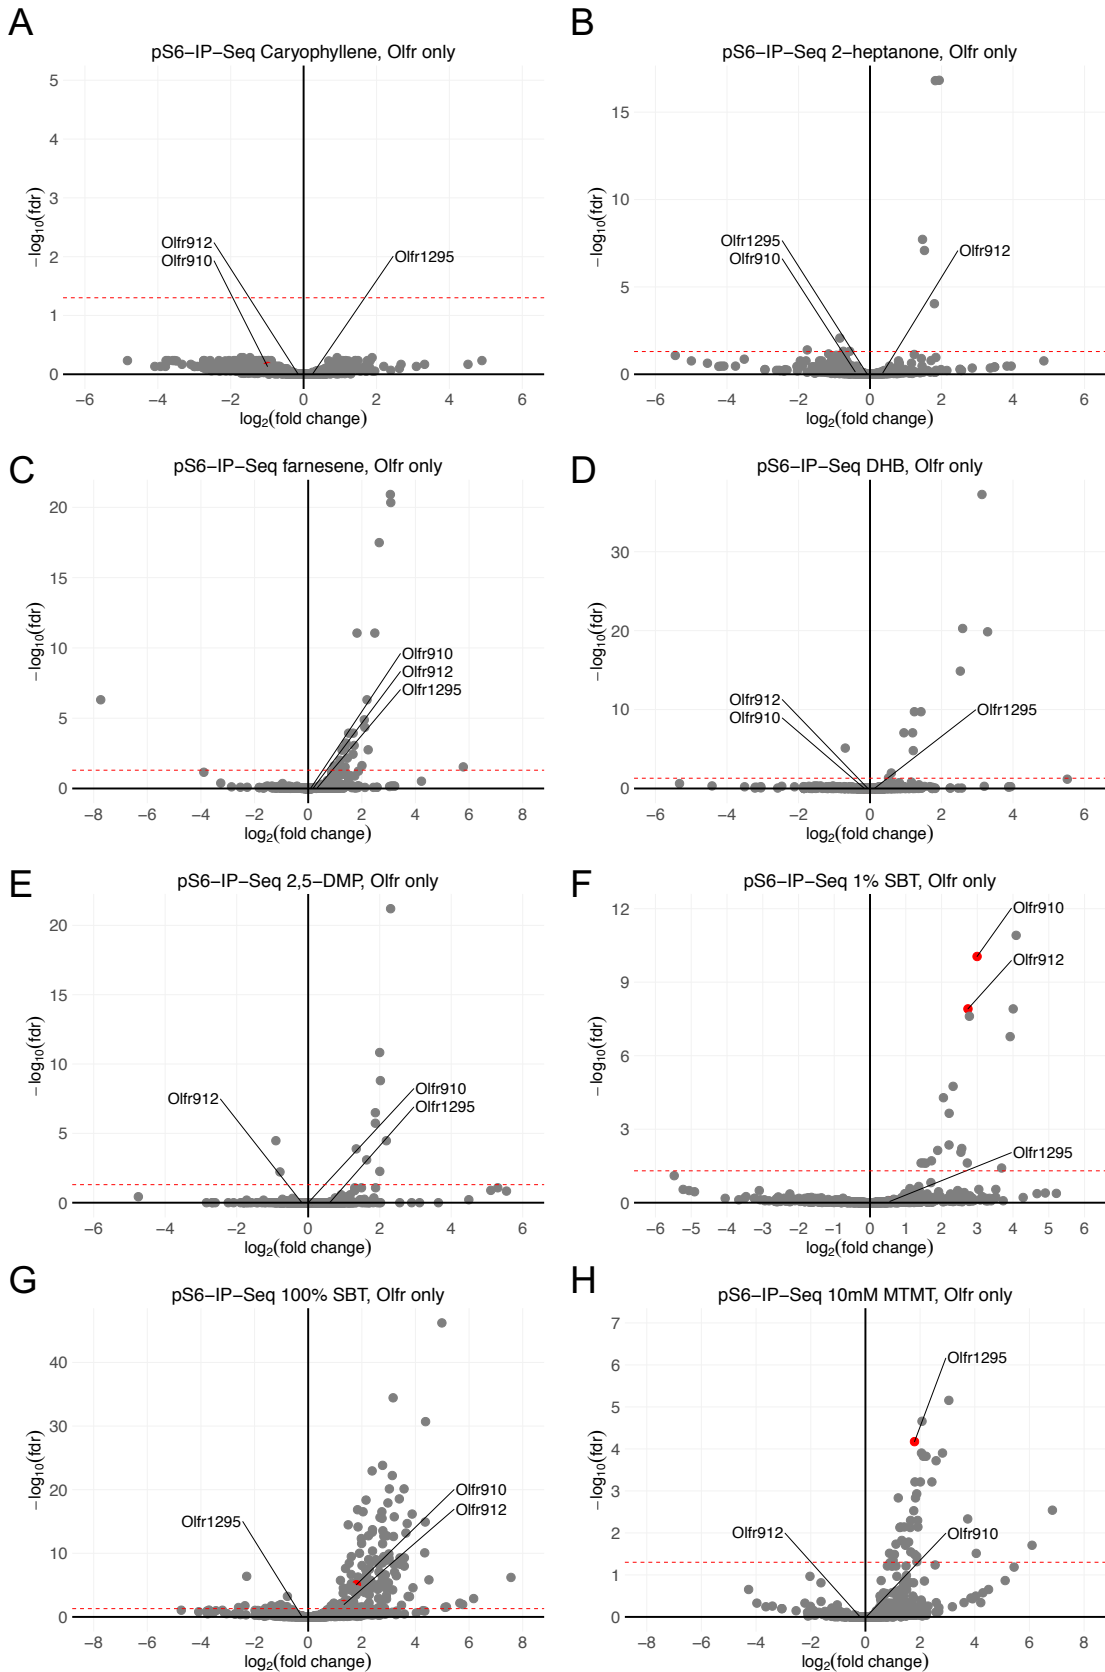



A

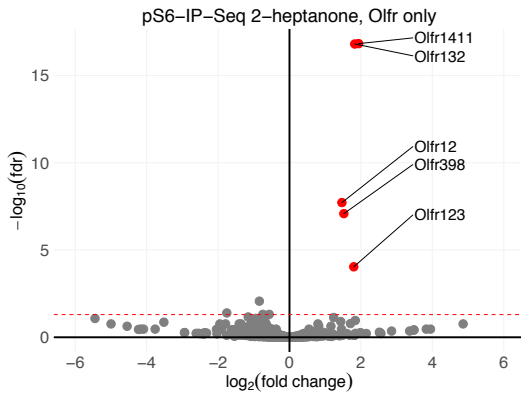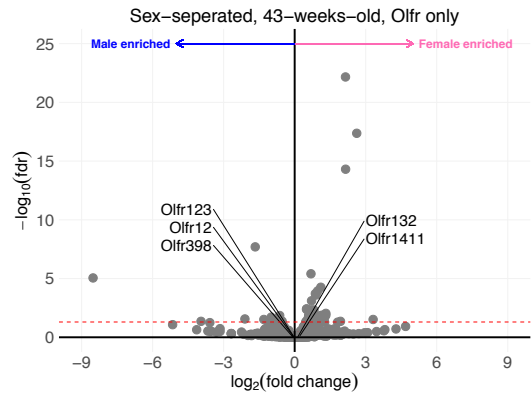

B

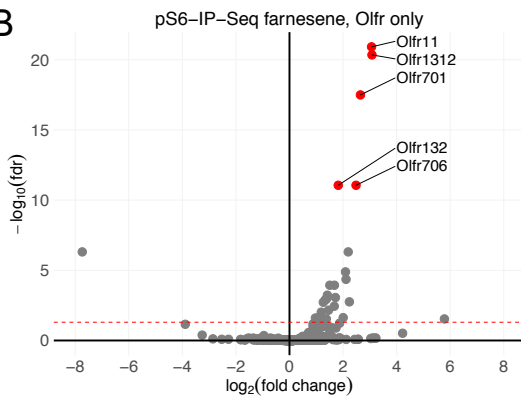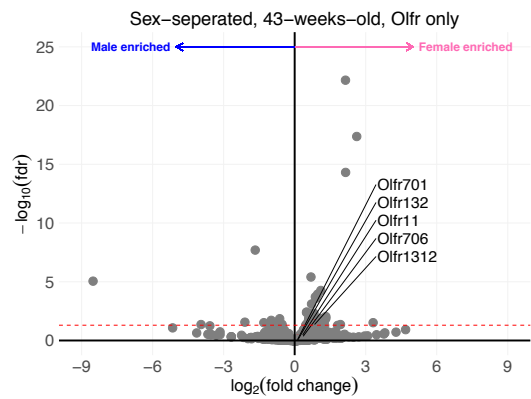

C

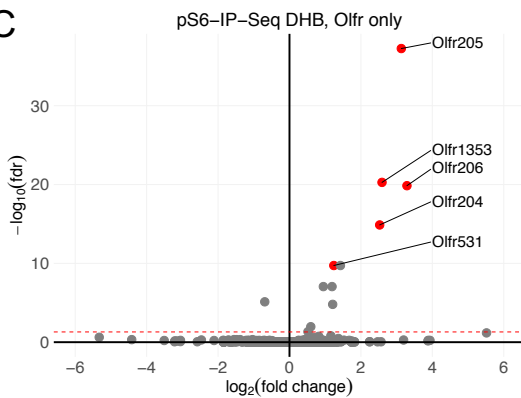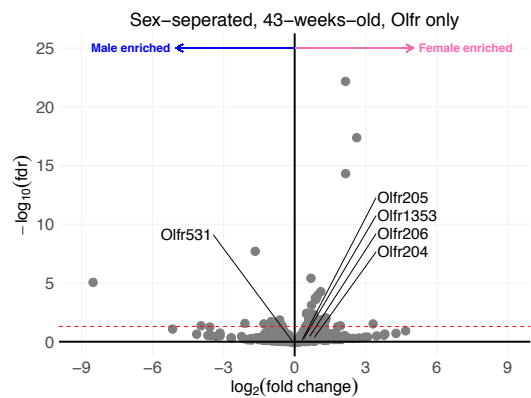

D

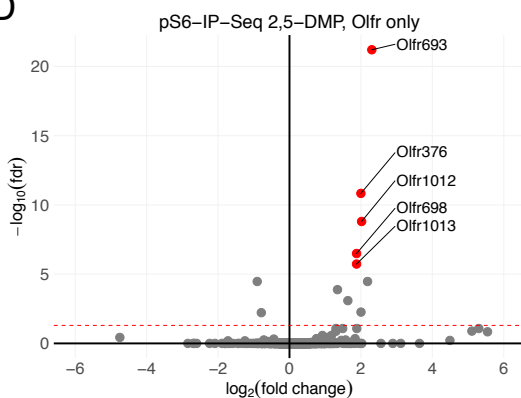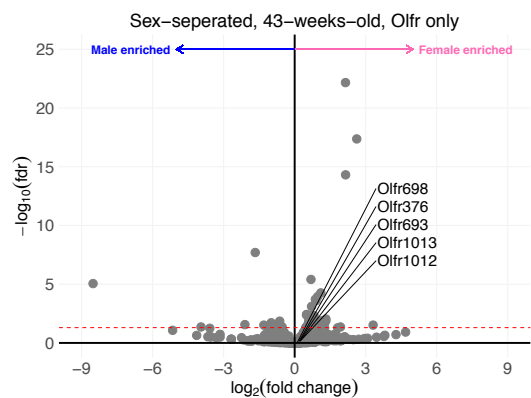

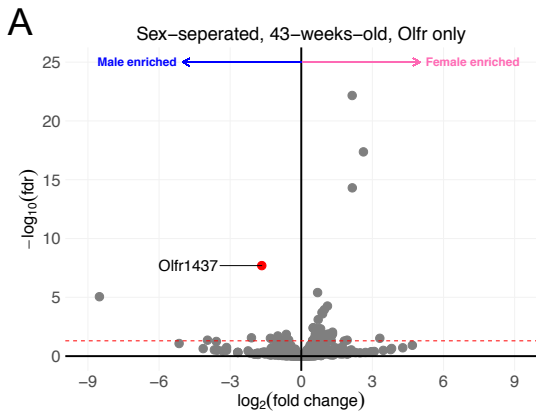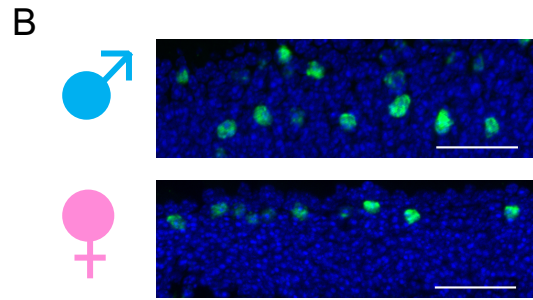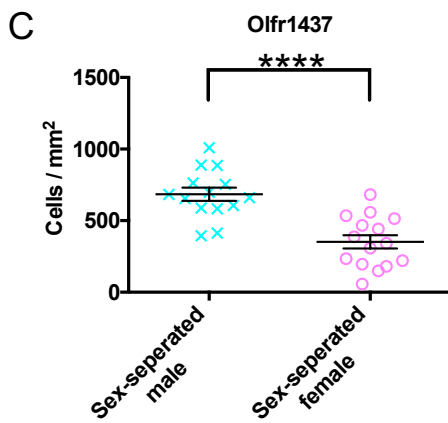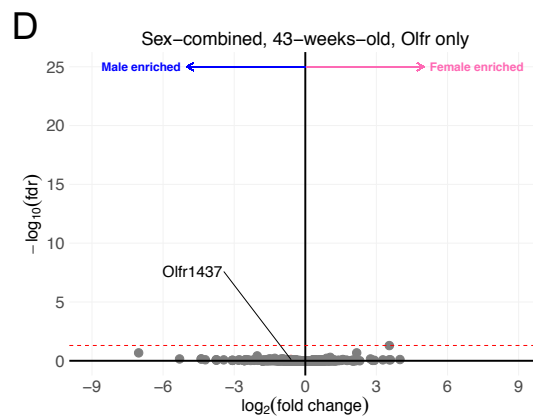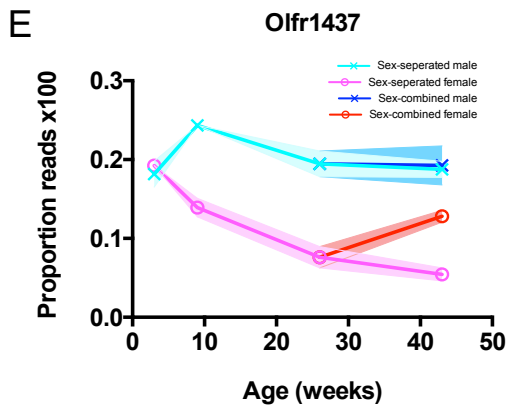

Source: https://www.biorxiv.org/content/10.1101/867044v1.full.pdf
